# Supplementary material for: Landslide displacement prediction using the GA-LSSVM model and time series analysis: a case study of Three Gorges Reservoir, China
Source: Copernicus journal article supplement (doi:10.5194/nhess-2017-87), 2017-03-29
Supplement: Supplementary file [file nhess-2017-87-AC3-supplement.pdf]

## Response to Reviewer's Comments

The authors would like to thank the reviewer for the careful reading and constructive comments that have helped sharpen this manuscript. In this revision, all the comments of the reviewers have been carefully addressed. Specific responses to the review comments are listed below. The line numbers refer to those in the revised manuscript.

### Anonymous Referee #2

*1. Introduction P1\_29, "...external factors, such as geological conditions..."ijN geological CI conditions should be internal factors.*

Response: Thank you for the careful reading. Indeed, geological conditions are considered as an internal factor in the manuscript. We have revised the manuscript accordingly. Please see **Introduction: Pg 1\_lines 35-36** in this revision.

*2. Introduction P1\_36, "in recently years" should be " in recent years".*

Response: Thank you for the careful reading. We have revised the text accordingly. Please see **Introduction: Pg 1\_lines 40** in this revision.

*3. Introduction P2\_23-26, Here, the studies, which also used GA-LSSVM model to predict landslide displacement, are suggested to be mentioned. For example, Cai Z, Xu W, Meng Y, et al. Prediction of landslide displacement based on GA-LSSVM with multiple factors. Bulletin of Engineering Geology & the Environment, 2016, 75(2):637-646.*

Response: Thank you for the constructive comments. We have revised the text accordingly. Please see **Introduction: Pg 2\_line 34** in this revision.

*4. Methodology P3\_24, "By searching or a function..."ijNhere "or" I guess is a spelling mistake.*

Response: Thank you for the careful reading. That is really a spelling mistake. We are very sorry for that our mistake in spelling words. We have revised the text accordingly. Please see **Methodology: Pg 3\_line 34** in this revision.

*5. Methodology P4\_17-18, I suggest the authors to supplement an equation contains both C and  $\sigma$  to express the model.*

Response: Thank you for the careful reading and constructive comments. We have revised the text accordingly. Please see **Methodology: Pg 5\_line 1-2** in this revision.

It can be seen from this paper that  $C$  is a penalty factor representing the penalty degree of the training samples, and  $\sigma$  is a parameter of the kernel function. The parameter of the model  $C$  and the parameter of the kernel function  $\sigma$  significantly influence the prediction performance. The parameter

$C$  represents the error tolerance. The more accurate the parameter is, the higher the prediction performance is, but this can lead to overtraining. The parameter  $\sigma$  implicitly determines the spatial distribution of data mapping in the new feature space.

In this paper, the radial kernel function is selected as the kernel function in the LSSVM model, so the determination of the parameters  $C$  and  $\sigma$  is very significant for the great prediction performance. However, the equation between  $C$  and  $\sigma$  expressed jointly the Eq. (5) ~ (10) is extremely complicated, which is inconvenient to be expressed by a certain formula.

In the machine learning of LSSVM, the parameters  $C$  and  $\sigma$  are hyper parameters that set the values before the beginning of the learning process, rather than the parameter data obtained by training. In general, it is necessary to optimize the hyper parameters and select a set of optimal hyper parameters for the machine learning of LSSVM to improve the performance and effective of learning. In this paper, the GA is selected as the method of parameter optimization in the LSSVM due to its advantages in determining the unknown parameters that are consistent between the predicted data and the measured data. By introducing the GA, the parameters  $C$  and  $\sigma$  can be derived automatically. In the process of calculation, the best parameter  $C$  is first obtained by searching the optimum. Then based on the best parameter  $C$ , the best parameter  $\sigma$  is obtained by training.

**6. Methodology P4\_22-P5\_2, These could be mentioned in introduction or put forward in a discussion section.**

Response: Thank you for the careful reading and kind comment. We have revised the text accordingly. Please see **Introduction: Pg 2\_line 24-31** in this revision.

**7. Methodology P5\_23-24, "The sampling...sampling data." This sentence is confusing. Why the data is independent.**

Response: Thank you for the careful reading and constructive comment. We have revised the text accordingly. Indeed, the sampling data used for landslide displacement prediction are continuous and mutually dependent landslide data which are applicable or feasible to the specific method. We are very sorry for that our mistake in this sentence. Please see **Introduction: Pg 3\_line 1-6 and Methodology: Pg 5\_line 25** in this revision.

It is well known that the evolution process of landslide is a complex non-linear process that is caused by the complex interaction of different factors, e.g. the complicated geological settings, varying hydrological conditions. Displacement time series are generally appreciated as the direct representation of the complex and non-linear dynamical behaviour of landslide. However, the landslide displacement induced by the external factors is approximately periodic. Therefore, a landslide displacement sequence is an instability time series with a periodic episodic movement characteristic. Because the integrity of the data collected at monitoring points has an effect on the displacement prediction, the monitoring data from July 2003 to October 2013 are selected to explore landslide deformation.

**8. Methodology P5\_26, It is not strict to conclude GA-LSSVM model has higher accuracy than other models due to the consideration of the trigger factors. Some other models also consider the trigger factors.**

Response: Thank you for the careful reading and constructive comment. We have revised the text accordingly. Please see **Methodology: Pg 5\_line 27-28** in this revision.

**9. Methodology P6, Fig 2, The technical route of left part is not clear. The methodology section is too long, authors are suggested to focus the introduction on what is new and what is developed by the authors to use the methodology to predict landslide displacement.**

Response: Thank you for the careful reading and constructive comment. We have revised the text accordingly. Please see **Methodology: Pg 6\_Fig. 6** in this revision. In addition, **Methodology P4\_22-P5\_2** of original manuscript, these are mentioned in **Introduction: Pg 2\_line 24-31** in this revision.

**10 Case study P6\_7,P6\_17,P6\_20-21,P6\_25,P6\_27-28, language should be improved.**

Response: Thank you for the careful reading and constructive comments. We have revised the text accordingly. Please see **Case study P6\_8, P6\_17-20, P6\_26** in this revision.

**11. Case study P7, Fig.4,& P8, Fig.5,the numbers in the legend needs to be explained.**

Response: Thank you for the careful reading and constructive comments. About Fig. 4 and Fig.5, we have added the key for legend information accordingly. Please see **Case Study: Pg 7\_Fig.4 & Pg8\_Fig.5** in this revision for details.

**12. Case study P8\_9-10, “in frontal area were relatively low” and “in the middle-rear areas were very high” are not consist with the monitoring data.**

Response: Thank you for the careful reading. That is really a mistake in writing. We are very sorry for that our mistake. We have revised the text accordingly. Please see **Case Study: Pg 8\_line 12 and line 14** in this revision for details.

**13. Case study P9\_5, The location of the local road in fig.7 is suggested to be marked on the map.**

Response: Thank you for the careful reading and constructive comment. We have revised the text accordingly. Please see **Case study: Pg 10\_Fig. 7** in this revision.

**14. Case study P9\_17-21, There is no groundwater monitoring method or data mention Here.**

Response: Thank you for the careful reading and constructive comment. We have revised the text accordingly. Please see **Case study: Pg 9\_line 17-18 and Fig. 6** in this revision.

**15. Landslide displacement prediction P11\_5-6, “The model...regarding...”, language should be improved.**

Response: Thank you for the careful reading and constructive comment. That is really a spelling mistake. We are very sorry for that our mistake in spelling words. We have revised the text accordingly. Please see **Landslide displacement prediction: Pg 11\_line 5-6** in this revision.

**16. Landslide displacement prediction P11\_17-19, R2 are calculated according to the total data or to the predictive part of the data? Fig.9 is suggested to mark the R2, calculated according to the predictive part of the data, on the curves.**

Response: Thank you for the careful reading and constructive comments. We agreed with the reviewer about the suggestion. We have revised the text accordingly. Please see **Landslide displacement prediction: Pg 11\_line 16-21** in this revision.

**17. Landslide displacement prediction P12\_11-16, “slight lag” is not described clearly.**

Response: Thank you for the careful reading. In this submission, we have revised the text accordingly. Please see **Landslide displacement prediction: Pg 12\_line 15-19 and Pg 12\_line 22-24** in this revision. Specific responses to the review comments are listed below.

From April 2007, it began to deform gently, giving rise (at station ZG86) to a maximum displacement of 184 mm over the 4-month period in May, June, July and August. Then from September, the periodic displacement of the landslide started to fall. During February and June 2007, the reservoir level decreased 10 m, while the rainfall was 297.7 mm during the subsequent 2 months, which should have been enough to trigger landslide deformation. Hence, the decrease of the reservoir water level continued to have an effect on displacement and there was also a lag effect, which means the displacement did not occur as soon as the reservoir water level decreased, but was delayed. As time passed, the effect of rainfall on the displacement diminished.

From June to September 2007, the reservoir level remained stable, but displacement was still 115 mm, which demonstrated the lag effect of the influence of reservoir water level. When the reservoir water level and the groundwater depth are decreasing at different speeds, the groundwater will respond with a lag in relation to the variations of the reservoir water level. Because of this, falls between the levels increase in magnitude, which will make the hydrodynamic pressure in the landslide grow continuously and induce the most significant deformation of the year. This means that every decline in reservoir water level results in a rise in the curve of cumulative displacement of the landslide. Seen in terms of the spatial evolution of the landslide deformation, the surface cracks of the Shuping landslide develop during April and August every year and have mainly been located on the road at the middle-frontal areas of the landslide. There is also substantial consistency between cumulative displacement and the development of cracks: the greater the deformation, the more seriously the cracks developed.

**18. Landslide displacement prediction P12 Fig.10, P13 Fig.11, why the authors choose the current month and past two month as two time periods for the indexes of variation of reservoir water level and rainfall? Is this choice reasonable? Because the influence period should be determined by detailed analyzing on the respond relationship between landslide displacement and influence factors.**

Response: Thank you for the constructive comment. In this submission, we have revised the text

accordingly. Please see **Landslide displacement prediction: Pg 14\_ line 2-3 and line 6-8** in this revision. Specific responses to the review comments are listed below.

In the Three Gorges Reservoir area, the external factors, including the reservoir water level, the rainfall and the groundwater, are the most significant transient forces that act upon landslides (Chen et al. 2005). In addition, as the identification of the landslide stability states may also be approached through the history of slope movements (Crozier 1986), the prophase displacement of landslides is also an essential item in the prediction of movement.

Based on research on the relationship between landslide and reservoir water level (Please see **Landslide displacement prediction-The predicted periodic component displacement: Pg 11\_line 25 and Pg 12\_line 1-19** in this revision), the variation of the reservoir water level 1 and 2 months before failure has a strong influence on landslide deformation rates. As shown in Fig. 10, over the previous 1 and 2 months, there are close relationships between variation of reservoir water level and the velocity of displacement. Change of reservoir level during the last month to reflect the influence of the rapidity of reservoir water level regulation: the analysis assumed that the water level was increased/decreased at constant velocity during 1 month.

Based on research on the relationship between landslide and rainfall (Please see **Landslide displacement prediction-The predicted periodic component displacement: Pg 11\_line 25 and Pg 12\_line 1-19** in this revision), the rainfall 1 and 2 months before failure has a strong influence on landslide deformation rates (Keefer et al. 1987; Zhang 2006; Du et al. 2013; Cao et al. 2015). As shown in Fig. 11, over the previous 1 and 2 months, there are also close relationships between cumulative rainfall and the velocity of displacement.

Therefore, by detailed analyzing on the respond relationship between landslide displacement and influence factors, we choose the current month and past two month as two time periods for the indexes of variation of reservoir water level and rainfall.

#### References:

- Chen, J., Yang, Z.F., Li, X.: (2005) Relationship between landslide probability and rainfall in Three Gorges Reservoir area, Chin J Rock Mech Eng, 17, 7, 2005.
- Crozier, M.J.: Landslides: causes, consequences and environment, Croom Helm, London, 1986.
- Keefer, D.K., Wilson, R.C., Mark, R.K., Brabb, E.E., Brown, W.M., Ellen, S.D., Harp, E.L., Wieczorek, G.F., Alger, C.S., Zatzkin, R.S.: Real-time landslide warning during heavy rainfall, Science, 238, 921–925, 1987.
- Zhang, G.R.: Spatial prediction and real-time warning of landslides and it's risk management based on WEBGIS, China University of Geosciences, Wuhan, 2006.
- Cao, Y., Yin, K., Alexander, D. E., and Zhou, C.: Using an extreme learning machine to predict the displacement of step-like landslides in relation to controlling factors, Landslides, 4, 725-736, 10.1007/s10346-015-0596-z, 2016.
- Du, J., Yin, K., and Lacasse, S.: Displacement prediction in colluvial landslides, Three Gorges Reservoir, China, Landslides, 10, 203-218, 10.1007/s10346-012-0326-8, 2013.

***19. Landslide displacement prediction P13\_16-18," the cumulative rainfall in the current month, the cumulative rainfall in the past two months, the reservoir water level, the variation in the reservoir water level in the current month, the variation in the reservoir water level in the past two months,***

*and groundwater depth are selected as input variables”, these variables have strong correlation, for instance, the reservoir water level and groundwater depth. Will this kind of dependent relationship between the variables influence the accuracy of prediction? How the authors think about it?*

Response: Thank you for the constructive comment. We have revised the text accordingly. Please see **Landslide displacement prediction: Pg 14\_line 11-18** in this revision. Specific responses to the review comments are listed below.

Based on the analysis of monitoring data and deformation characteristics, rainfall and reservoir water level are the main factors that influence the landslide displacement. The reason is that the infiltration of rainfall and reservoir water level changes the dynamic characteristics of groundwater in landslide, which reflects the change of groundwater level. On the one hand, the change of groundwater level makes sliding mass or sliding zone in a dry and wet circulation state, which leads to changes in the physical and mechanical properties of the sliding mass or sliding zone. On the other hand, due to the change of groundwater level, the seepage force and the uplift pressure of groundwater acting on the landslide change dynamically.

Due to differences in permeability of different landslides or the different parts of the landslide, the responses of groundwater level to rainfall and reservoir water level are not the same. In addition, the change in groundwater level exhibits considerable agreement with rainfall and reservoir water level fluctuations, with a slight lag. The relationships between the periodic displacement and the groundwater and the reservoir water level are illustrated in Fig. 10 and 11. For instance, in the rising phase of reservoir water level, the groundwater level gradually increases, with a slight lag behind the increase in the reservoir water level. The groundwater remains high enough for ongoing movement to continue. Conversely, the groundwater level decreases in the declining phase of the reservoir water level. Therefore, groundwater influences displacement.

Hence, considering the influences of rainfall and reservoir water level on landslide displacement, and in order to make prediction performance more accurate, it is necessary to select groundwater level as input variable for landslide prediction.

**20. Landslide displacement prediction P14\_9-10, “Notably, ...water level.” However, Fig.12 (b) did not match well.**

Response: Thank you for the careful reading and constructive comment. We have revised the text accordingly. Please see **Landslide displacement prediction: Pg 14\_line 32-35** in this revision.

**21. Landslide displacement prediction P14-16 Table 3, Table 4, Table 5, the measured cumulative displacement data are not from small to large in time. For example, ZG85üjN2012/11/1, 3442.907mm is smaller than 2012/10/1, 3460.208mm. Please explain why the cumulative displacement decreased?**

Response: Thank you for the careful reading and constructive comment. To avoid the potential confusion, essential discussion was added in this revision.

It was noted that there are three situations like this. For example, in Table 3, 2012/11/1, 3442.907 mm

is smaller than 2012/10/1, 3460.208 mm, and 2013/3/1, 3460.208 mm is smaller than 2013/2/1, 3477.509 mm. In Table 4, 2013/9/1, 4602.076 mm and 2013/10/1, 4602.076 mm are all smaller than 2013/8/1, 4619.377 mm. However, in Table 5, the measured cumulative displacement data are from small to large in time. To address the comments by the reviewer, the following explanations are made in this submission.

Due to the rapid deformation rate of Shuping landslide in the present, Shuping landslide may deform and even fail. Hence, in order to prevent the deformation and failure of the landslide during the recession period of reservoir water level or heavy rainfall, it is necessary to take measurements to reduce the landslide displacement rate and improve the stability of the landslide. It is noted that from August 2012 to December 2012, Hubei Province geological environment Terminus had completed the investigation and emergency control design of Shuping landslide. The overall plan for emergency control engineering of Shuping landslide is to cut slope in middle-rear areas, press foot in frontal areas below 175 m of the reservoir water level and layout the drain ditch in the surface near the landslide boundary. After starting the emergency control project in 2013, by comparing the deformation characteristics of the landslide before and after the implementation of the project, the displacement rate decreased and the abrupt change of landslide disappeared gradually during the recession period of reservoir water level, which indicated that the emergency control project has achieved good performances.

In addition, in the rising phase of the reservoir water level, the anti-sliding sections of the landslide are constantly submerged, and the anti-sliding force decreases while the sliding force increases continuously at a faster rate. Moreover, due to the reverse seepage function of reservoir water level, it is beneficial to the stability of the landslide with characterizing of unobvious deformation of the landslide. Conversely, in the declining phase of the reservoir water level, the sliding force increases under the action of the hydrodynamic pressure in the anti-sliding sections of the landslide, which results in the large deformation of the landslide and the decline of the stability. In terms of this kind of landslide, there is basically no sign of deformation in the rising phase of the reservoir water level. But it is very sensitive to the decline of reservoir water level.

For instance, in October 2012, the reservoir water level rose close to higher value (172.7 m) than that (166.5 m) in November 2012. In this month, the deformation velocity of the front edge (ZG85) decreased to 0.56 mm/day. Hence, for ZG85, the cumulative displacement on 2012/11/1 is smaller than that on 2012/10/1. During the subsequent water level decreasing stage in July 2013, the water level decreased to the lowest value (145 m). The deformation velocity of the front edge increased to 3.58 mm/day.

In conclusion, the rising phase and the declining phase of the reservoir water level will make landslide displacement vibration. That means that the trend of displacement growth of some landslides is not obvious, with characterizing of jagged cumulative displacement curve related to the rising phase and the declining phase of the reservoir water level. Therefore, the measured cumulative displacement data are not necessarily from small to large in time. Such is the displacement of Sangshuping landslide, which is also located in Shazhenxi town, Zigui country, Hubei province, China, near the tributary of Yangtze River, Qinggan River and approximately 6 km into the Yangtze River. Moreover, according to the reference (Huang et al. 2016), the cumulative displacement of the Baijiabao landslide monitored by GPS are fluctuation within a narrow range and is not monotonically increasing with time, such as in August 2007 and June 2009.

References:

Huang, F. M., Yin, K. L., Zhang G. R., Gui, L., Yang, B. B., Liu, L.: (2016) Landslide displacement prediction using discrete wavelet transform and extreme learning machine based on chaos theory, *Environmental Earth Sciences*, 75, 20, 1376.



# Landslide displacement prediction using the GA-LSSVM model and time series analysis: a case study of Three Gorges Reservoir, China

Tao Wen<sup>1</sup>, Huiming Tang<sup>1, 2\*</sup>, Yankun Wang<sup>2</sup>, Chengyuan Lin<sup>1</sup>, Chengren Xiong<sup>2</sup>

<sup>1</sup> Faculty of Engineering, China University of Geosciences, Wuhan 430074, Hubei, People's Republic of China; <sup>2</sup> Three Gorges Research Center for Geo-hazards of Ministry of Education, China University of Geosciences, Wuhan, Hubei 430074, People's Republic of China

\*Corresponding author: tanghm@cug.edu.cn

**Abstract** Predicting landslide displacement is challenging, but accurate predictions can prevent casualties and economic losses. Many factors can affect the deformation of a landslide, including the geological conditions, rainfall, and reservoir water level. Time series analysis was used to decompose the cumulative displacement of landslide into a trend component and a periodic component. Then the least squares support vector machine (LSSVM) model and genetic algorithm (GA) were used to predict landslide displacement, and we selected a representative landslide with **episodic movement** deformation as a case study. The trend component displacement, which is associated with the geological conditions, was predicted using a polynomial function, and the periodic component displacement which is associated with external environmental factors, was predicted using the GA-LSSVM model. Furthermore, based on a comparison of the results of the GA-LSSVM model and those of other models, the GA-LSSVM model was superior to other models in predicting landslide displacement, with the smallest root mean square error (*RMSE*) of **62.4146 mm**, mean absolute error (*MAE*) of **53.0048 mm**, and mean absolute percentage error (*MAPE*) of **1.492%** at monitoring station ZG85, while these three values are **87.7215 mm**, **74.0601 mm** and **21.1703%** at ZG86 and **49.0485 mm**, **48.5392 mm** and **3.131%** at ZG87. The results of the case study suggest that the model can provide good consistency between measured displacement and predicted displacement, and periodic displacement exhibited good agreement with trends in the major influencing factors.

**Keywords** landslide; displacement prediction; least squares support vector machine; genetic algorithm; reservoir water level; rainfall

## 1 Introduction

In the Three Gorges Reservoir region, landslides are the main type of geo-hazard, and they cause critical harm to individuals and property each year (Du et al. 2013; Yao et al. 2013; Lian et al. 2014; Cao et al. 2016). **The displacement prediction of landslides is a major focus in the field of landslide research (Sassa et al. 2009; Du et al. 2013). Comprehensive analyses of landslide response and displacement predictions of landslide based on external factors are effective methods that rely on landslide deformation data. The evolution process of landslide is a complex non-linear process caused by the complex interaction of different factors. The accurate prediction of reservoir landslide processes is an important basis for early prevention, and it can reduce the loss of property and lives (Corominas et al. 2005). Therefore, geological surveying, monitoring, landslide prevention and landslide prediction must be improved to minimise the losses caused by landslides (Kirschbaum et al. 2010; Miyagi et al. 2011; Ahmed 2013). A landslide can be regarded as a nonlinear and dynamic system that is affected by external factors, such as rainfall, reservoir water levels, groundwater, etc. (Guzzetti et al. 2005; Kawabata and Bandibas 2009). Due to the influences of external factors, deformation displacement of landslide generally exhibits the same tendencies as the variations in external factors, which can result in misleading landslide prediction. Displacement time series is usually considered as a direct representation of complex nonlinear dynamical behavior of landslide.**

In recent years, grey system models, time series models, neural network models, extreme learning machines, support vector machines (SVM), etc. have been widely used for landslide displacement prediction (Wang 2003; Pradhan et al. 2014; Gelisli et al. 2015; Goetz et al. 2015; Kavzoglu et al. 2015). Previously, landslide susceptibility maps were assessed using a back propagation artificial neural network and logistic regression analysis (Nefeslioglu et al. 2008). Additionally, dynamic time series predictors were proposed based on echo state networks (Yao et al. 2013). Lian et al. (2013) used an extreme learning machine and ensemble empirical mode decomposition to predict landslide displacement. Although these models were constructed based on different

1 algorithms, each has strengths and weaknesses. Grey system models are widely used in analyses of exponential time series.  
2 However, for complex nonlinear slope displacement series, prediction results can yield considerable error (Yin and Yu 2007; Sun  
3 et al. 2008). Additionally, autocorrelation coefficients, partial correlation coefficients and pattern recognition features are difficult  
4 to determine via time series analysis (Brockwell and Davis 2013; Turner et al. 2015). The neural network method is a powerful  
5 tool in landslide prediction (Liu et al. 2014; Lian et al. 2015). However, the conventional neural network has many limitations,  
6 including overfitting and a shortage of theoretical guidance in the selection of the number of network nodes in the hidden layer,  
7 which diminishes its prediction ability (Hwang et al. 2014). In addition, the neural network neglects practical issues by using a  
8 pre-defined activation function. Compared with traditional learning algorithms, although extreme learning machines are  
9 characterized by high generalization, good performance and fast computing speed, their output is different at different times due to  
10 the use of randomly selected input (Lian et al. 2014). Thus, it is difficult to reflect large quantities of information completely and  
11 predict landslide displacement accurately using these models because landslide displacement is actually a finite time series.

12 The SVM model can effectively overcome the limitations of other methods, including small sample sizes, high  
13 dimensionality and nonlinearity. Many studies have illustrated the ability of SVM models to recognize learning patterns, such as  
14 nonlinear regression, and obtain the global optimum solutions to these problems (Feng et al. 2004; Marjanović et al. 2011;  
15 Micheletti et al. 2011; Hong et al. 2016). Although these problems can be transformed into quadratic convex programming  
16 problems, the computation speed of the SVM model is slow when the training data set is large or the dimensionality is high  
17 (Zhang et al. 2009). To overcome these inadequacies, we use the least squares support vector machine (LSSVM) proposed by  
18 Suykens and Vandewalle (1999), which is a supervised learning model that has been widely applied in other machine learning  
19 problems, such as function fitting. The LSSVM model uses the square sum of the least square linear system error as the loss  
20 function and solves the problem by transforming it into a set of equations, which increases the solution speed and reduces the  
21 required calculation resources (Suykens et al. 2002; Lv et al. 2013; Xu and Chen 2013; Zhang et al. 2013). Additionally, this  
22 method yields good performance in pattern recognition and nonlinear function fitting. However, the selection of parameters is  
23 crucial to developing an efficient LSSVM model due to its sensitivity to small variations in the parameters.

24 Currently, several intelligent algorithms are used to solve optimization problem, such as the GA (Li et al. 2010; Ali et al.  
25 2013), grid algorithm (Lin 2001), particle swarm optimization (Vandenbergh and Engelbercht 2006) and genetic programming  
26 (Garg and Tai 2011; Shen et al. 2012). However, compared with the GA, the grid algorithm is tedious and cannot yield  
27 satisfactory results (Gu et al. 2011). For discrete optimization problems, particle swarm optimization performs poorly and often  
28 yields local optima (Fei et al. 2009). In addition, genetic programming, which was developed by Koza (1992), provides solutions  
29 to complex problems using evolutionary algorithms, and the method is typically expressed as a tree structure that consists of  
30 terminals and functions; however, it is difficult to generate new individuals, which seriously affects the convergence rate (Garg et  
31 al. 2014). The genetic algorithm (GA) is a global optimization algorithm that uses highly parallel, random and adaptive searching  
32 based on biological natural selection and optimization. Thus, the method is particularly suitable for solving complex and nonlinear  
33 problems (Li et al. 2010; Ali et al. 2013; Cai et al. 2016). In this paper, the GA is selected as the method of parameter optimization  
34 in the LSSVM due to its advantages in determining the unknown parameters that are consistent between the predicted data and the  
35 measured data. By introducing the GA, some key parameters of the LSSVM model can be derived automatically. Therefore, we  
36 select the combination of the LSSVM model and the GA to predict landslide displacement.

37 Due to the influences of rainfall, reservoir water level and human activities on the monitoring data of landslide displacement,  
38 most monitoring data series are incomplete or highly variable. These issues introduce uncertainty into the mathematical model and  
39 increase the difficulty of prediction. To overcome this and obtain the main error sources, a time series analysis of displacement is  
40 conducted by decomposing the monitoring data series into several components (Du et al. 2013). Then, the monitoring data series  
41 are simulated using the moving average method. Shuping landslide, a typical landslide with episodic movement deformation, was  
42 taken as an example to validate and the GA-LSSVM model with time series analysis.

## 43 2 Methodology

### 44 2.1 Time series analysis of displacement

45 Cumulative displacement of landslides is caused by the combined effects of internal geological conditions (lithology,  
46 geological structure, topography, etc.) and external environmental factors (rainfall, reservoir water level, groundwater, etc.). The

displacement of landslide sequence is an instability time series. The landslide displacement caused by the former increases generally with time, which reflects the trend in cumulative displacement. Landslide deformation exhibit long-lasting and continuous movements under gravity loads that is affected by the creep characteristic (Desai et al. 1995). One of the important reasons that influence the creep behavior is the expression of the response of geological materials and interfaces. Landslide deformation is often characterized by creep, which generally need to undergo three stages, initial deformation, stable deformation and accelerated deformation stage. However, the landslide displacement induced by the latter is approximately periodic. Therefore, a landslide displacement sequence is an instability time series with a periodic episodic movement characteristic. According to time series analysis, cumulative displacement can be decomposed into three portions as follows:

$$y_t = p_t + q_t + \varepsilon_t \quad (1)$$

where  $y_t$  is the cumulative displacement,  $p_t$  is the trend component displacement,  $q_t$  is the periodic component displacement, and  $\varepsilon_t$  is the random component displacement.

However, it is difficult to obtain relevant data regarding the random component (wind loads, car loads, etc.) due to the lack of advanced monitoring methods. In this paper, the random component displacement is not considered. Therefore, we can simplify the time series model as follows.

$$y_t = p_t + q_t \quad (2)$$

The trend component can be extracted using the moving average method as follows:

$$A_i = \{a_1, a_2, \dots, a_j, \dots, a_n\} \quad (3)$$

$$\overline{p}_t = \frac{a_t + a_{t-1} + \dots + a_{t-k+1}}{k} (t = k, k+1, \dots, n) \quad (4)$$

where  $A_i$  is the time series of cumulative displacement of the  $i$ th monitoring system ( $i=1, 2, \dots, m$ ),  $a_j$  is the cumulative displacement of the  $i$ th monitoring system at time  $j$  ( $j=1, 2, \dots, n$ ),  $\overline{p}_t$  is the extracted value of the trend component, and  $k$  is the moving average period.

The periodic component displacement can be acquired by subtracting the trend component displacement from the cumulative displacement. Therefore, the time series model not only reflects the relationship between each component of cumulative displacement but also provides mathematical and physical meaning for landslide displacement prediction.

## 2.2 LSSVM

The LSSVM model is a regression prediction method with nonlinear characteristics based on a statistical learning theory, and it is regarded as an improved form of the SVM (Vapnik 1995; Abdi and Giveki 2013). First, after dividing the sample data into training samples and testing samples, the training samples are plotted in a high-dimension feature space via nonlinear mapping. Then, the optimal decision function model is obtained for the best-fitted results by training the sample data  $\{x_j, y_j\}$ , where  $j=1, 2, 3, \dots, n$ . The regression function of the LSSVM can be expressed as follows:

$$f(x) = W^T \varphi(x) + b \quad (5)$$

where  $W^T$  is the weight vector,  $\varphi(x)$  is a nonlinear mapping function that maps the sample data into the feature space,  $x$  is the input,  $y$  is the output, and  $b$  is the offset.

By searching a function  $f(x)$  that adjusts the dispersion degree of the training samples, we can obtain a risk-minimized solution. This solution can be written using the structural risk minimization principle:

$$\text{Minimize: } \frac{1}{2}W^TW + \frac{C}{2}\sum_{j=1}^n \xi_j^2 \quad (6)$$

$$\text{Subject to: } y_j = W^T\varphi(x_j) + b + \xi_j (j=1,2,\dots,n) \quad (7)$$

where  $C$  is a penalty factor representing the penalty degree of the training samples,  $b$  is the offset, and  $\xi_j$  is the relaxation factor.

Based on the Lagrange equation and duality theory, the optimization problem can be converted into a dual problem:

$$L(W, b, \xi, \alpha) = \frac{1}{2}W^TW + \frac{C}{2}\sum_{j=1}^n \xi_j^2 - \sum_{j=1}^n \alpha_j (W^T\varphi(x_j) + b + \xi_j - y_j) \quad (8)$$

where  $\alpha_j$  is the Lagrange multiplier.

The solution of the optimization equation is obtained by solving the partial differential form of the Lagrange equation with respect to  $W$ ,  $b$ ,  $\xi_j$ ,  $\alpha_j$ . The optimization equations are expressed as follows.

$$\begin{cases} \frac{\partial L}{\partial W} = 0 \Rightarrow W = \sum_{j=1}^n \alpha_j y_j \varphi(x_j) \\ \frac{\partial L}{\partial b} = 0 \Rightarrow \sum_{j=1}^n \alpha_j y_j = 0 \\ \frac{\partial L}{\partial \xi_j} = 0 \Rightarrow \alpha_j = C \xi_j \\ \frac{\partial L}{\partial \alpha_j} = 0 \Rightarrow y_j [W^T \varphi(x_j) + b] - 1 + \xi_j \end{cases} \quad (9)$$

The linear equations can be obtained by solving Eq. (9) with the elimination of  $W$  and  $\xi$ :

$$\begin{bmatrix} 0 & I^T \\ I & ZZ^T + C^{-1}E \end{bmatrix} \begin{bmatrix} b \\ \alpha \end{bmatrix} = \begin{bmatrix} 0 \\ y \end{bmatrix} \quad (10)$$

where  $y = [y_1, y_2, \dots, y_l]^T$ ,  $I = [1, \dots, 1]^T$ ,  $\alpha = [\alpha_1, \alpha_2, \dots, \alpha_l]^T$ ,  $Z = [\varphi(x_1), \varphi(x_2), \dots, \varphi(x_l)]^T$  and  $E$  is the unit matrix with  $l$  dimensions.

Then, the regression prediction model of the LSSVM can be rewritten based on the above optimization problem:

$$f(x) = \sum_{j=1}^n \alpha_j K(x, x_j) + b \quad (11)$$

where  $K(x_j, x)$  is a kernel function.

In the paper, we select the radial basis kernel function as the kernel function in the LSSVM model to obtain the optimal solutions due to its strong nonlinear mapping ability and wide convergence domain (Min and Lee 2005; Altinel et al. 2015; Elbisy 2015; Farzan et al. 2015):

$$K(x_j, x) = \exp(-(x - x_j)^2) / (2\sigma^2) \quad (12)$$

where  $\sigma$  is a parameter of the kernel function.

The equation between  $C$  and  $\sigma$  expressed jointly the Eq. (5)~(10) is extremely complicated, which is inconvenient to be expressed by a certain formula. However, the parameter of the model  $C$  and the parameter of the kernel function  $\sigma$  significantly influence the prediction performance. The parameter  $C$  represents the error tolerance. The more accurate the parameter is, the higher the prediction performance is, but this can lead to overtraining. The parameter  $\sigma$  implicitly determines the spatial distribution of data mapping in the new feature space. Therefore, some measures should be taken to optimize the LSSVM parameters.

### 2.3 GA

The GA is a computational model commonly used to simulate natural selection and the biological evolution processes of genetic mechanisms. The GA provides solutions for complicated problems using evolutionary algorithms (Levasseur et al. 2008; Hejazi et al. 2013). The typical genetic operations include selection, crossover and mutation.

Based on certain methods and theories, selection operations, such as the fitness-ratio selection algorithm, ranking algorithm, Monte Carlo selection and tournament selection, are commonly used to choose a parental generation from a population based on an individual's fitness value. Crossover operation can generate two new offspring by selecting random codes from two parents and then exchanging their respective branches. Point mutation is commonly used as the mutation operator. By selecting a random node from a parent, a new individual is generated by substituting the selected random node into another parent branch. A typical genetic algorithm is shown in Fig. 1. Selection operations, crossover operations and mutation operations are probabilistic, and with a probability of over 90%, crossover operations are the most widely used.

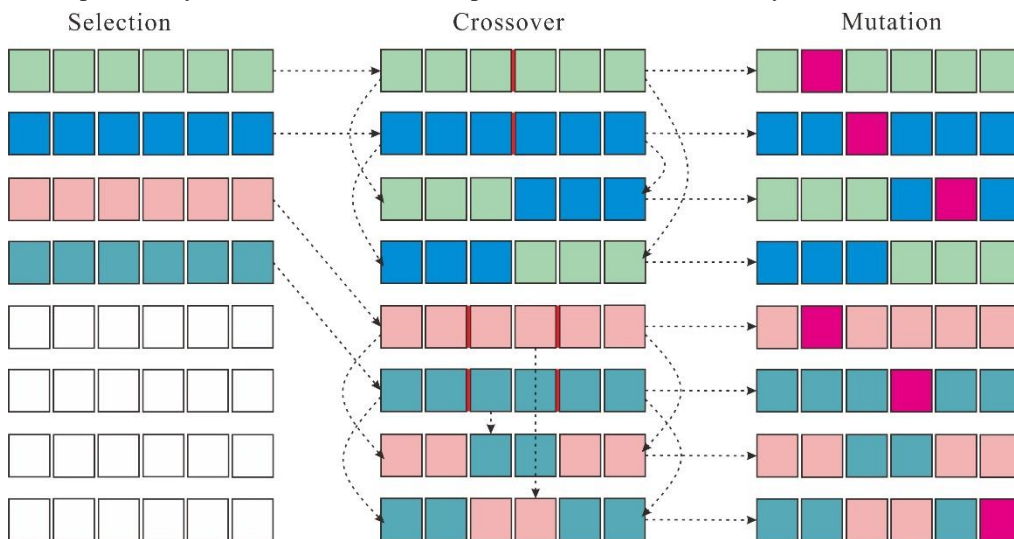

Fig. 1 Diagram of genetic operations

### 2.4 GA-LSSVM model

To obtain the best model, the parameters of the model must be carefully selected in advance (Duan et al. 2003). According to some research results (Lessmann et al. 2005; Pourbasheer et al. 2009), the GA has the advantages of reducing the blindness of artificial selection and enhancing the discrimination ability of the LSSVM model. Modeling with this method can achieve high precision if the training samples are reliable. The sampling data used for landslide displacement prediction are continuous and mutually dependent landslide data which are applicable or feasible to the specific method. In this paper, the periodic component displacement is predicted by the GA-LSSVM model, which has higher accuracy than other models due to the consideration of the external environmental factors and its advantage in determining the unknown parameters that have great consistent between the predicted data and the measured data. MATLAB software is used to execute the model. The flowchart of the GA-LSSVM model is presented in Fig. 2.

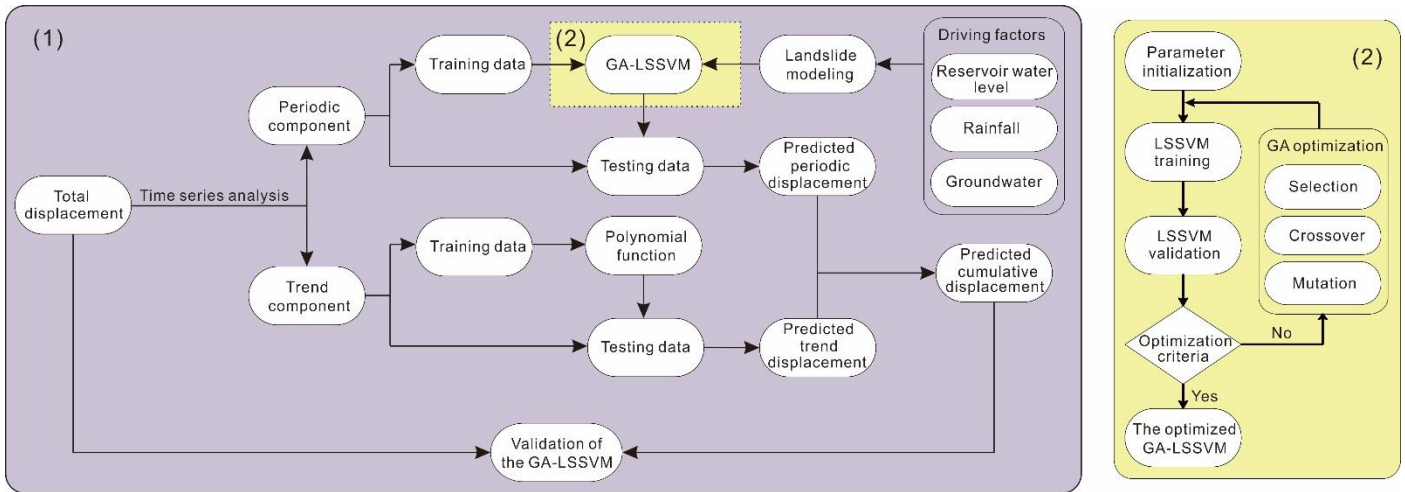

Fig. 2 The basic flowchart of the GA-LSSVM model, including the validation of the model and the establishment of the GA-LSSVM model

### 3 Case study: Shuping landslide

#### 3.1 Geological conditions

The Shuping landslide is located in the town of Shazhenxi, Zigui Country, Hubei Province, China, near the Yangtze River and approximately 47 km into the upper reach of Three Gorges Dam (Fig. 3). The sliding direction of Shuping landslide is N11°E, and the landslide is displayed as a sector on a topographic map (Fig. 3). The reservoir water level in Fig. 3 is 166 m. The topography is relatively flat, with a mean slope angle of 22°. The highest elevation of the landslide is 400 m above sea level. The head scarp of the landslide reaches to the riverbed of the Yangtze River at 60 m in elevation. The landslide covers an area of approximately  $54 \times 10^4 \text{ m}^2$ , with an average length of 800 m in the longitudinal direction and an average length of 670 m in the transverse direction. The landslide volume is  $2070 \times 10^4 \text{ m}^3$ , with an average sliding surface depth of 40 m (Fig. 4). Fig. 4 shows the eight GPS monitoring stations installed on the ground surface of the landslide, as well as four inclinometer monitoring holes. The bedrock is mainly sandy mudstone. The strata comprise the Triassic Badong formation. The dip direction of the bedrock is between 120° and 165°, and the dip angle is between 10° and 35°. The landslide is divided into an eastern portion and a western portion, and the materials of the landslide mainly include Quaternary deposits, soils containing silty clay and rock fragments with a loose and disorderly structure (Fig. 5). Fig. 5 shows a longitudinal section of the eastern portion of the landslide. We can see from Fig. 5 that the sliding surface located between the deposits and the bedrock is steep in the upper area.

Underground moisture beneath the landslide is primarily groundwater flowing through loose media that include colluviums, deposits, etc. Landslide deformation became more active after water storage began in Three Gorges Reservoir in June 2003. Various external factors affect the landslide displacement, including rainfall, the reservoir water level, surface water infiltration, groundwater, etc.

#### 3.2 Monitoring data and deformation characteristics of the landslide

Field investigations revealed that there was no obvious deformation of the landslide before the first impoundment of the reservoir on June 15, 2003. However, cracking occurred in roads and houses after the first impoundment. Monitoring stations were installed to measure the deformation characteristics and the stability of the landslide and to observe the interactions between different portions of the landslide. The monitoring methods include geodetic surveys, drilling, meteorological observations and geological investigations. Thus, the development processes and evolution of the landslide can be analyzed quantitatively using monitoring data from eight monitoring stations and four inclinometer monitoring holes located along the longitudinal direction of the landslide (ZG85 to ZG90, SP-2 and SP-6, and QZK1 to QZK4 in Fig. 4).



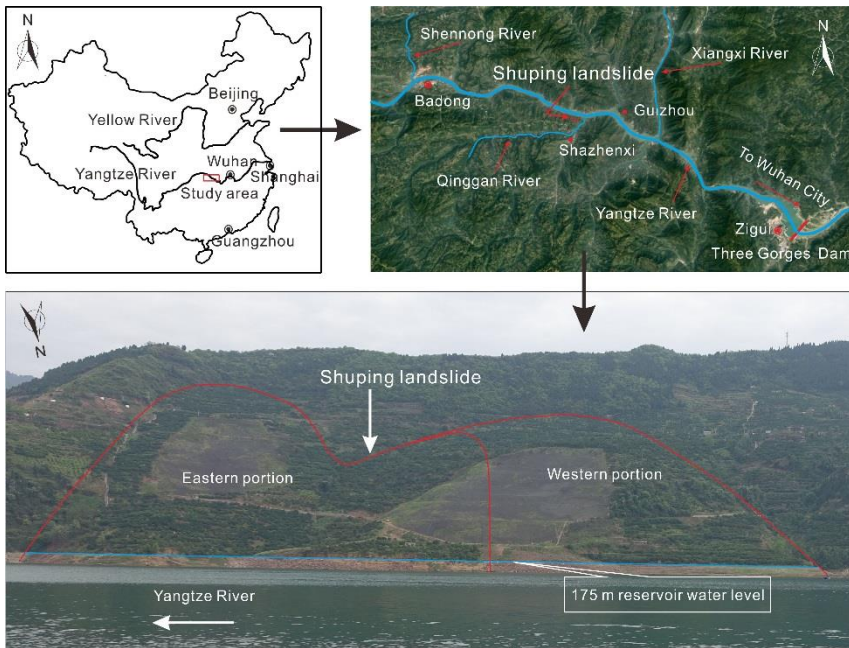

1  
2 Fig. 3 Location of the study area and panorama of the Shuping landslide and landslide subzones

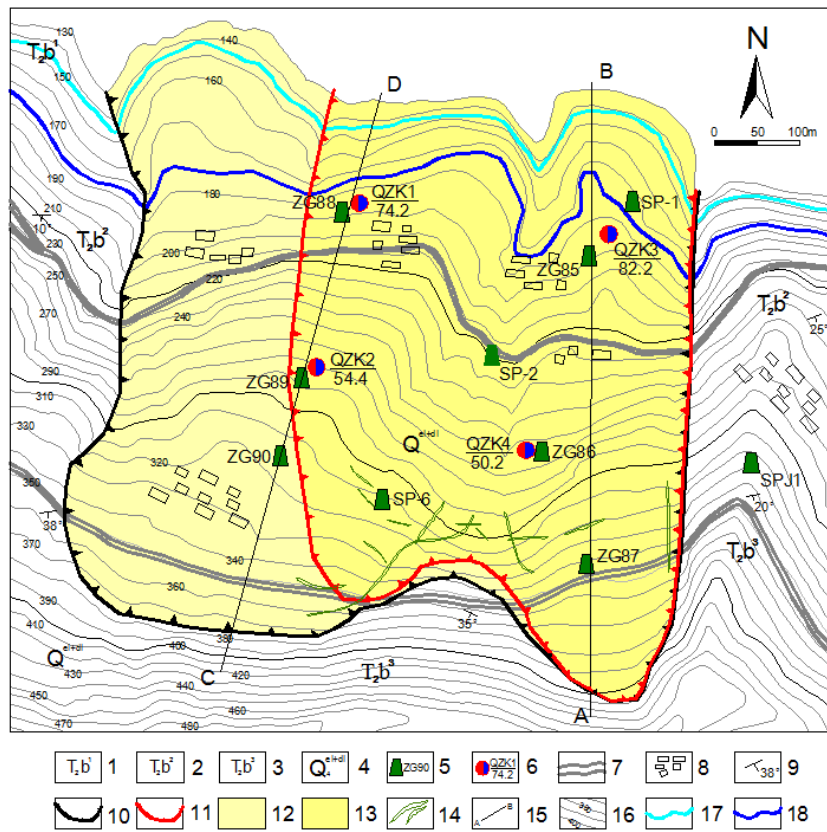

3  
4 Fig. 4 Geology and deformation monitoring map of Shuping landslide. 1 Middle Triassic Badong Formation Section 1, 2 Middle  
5 Triassic Badong Formation Section 2, 3 Middle Triassic Badong Formation Section 3, 4 Quaternary colluviums, 5 GPS  
6 monitoring stations and number, 6 inclinometer monitoring hole and its depth (the unit of depth is the meter), 7 roads, 8 houses, 9  
7 lithology orientation, 10 landslide boundary, 11 main sliding boundary, 12 western portion zone, 13 eastern portion zone, 14  
8 cracks, 15 longitudinal section, 16 counter line, 17 reservoir water level (145 m), and 18 reservoir water level (175 m)

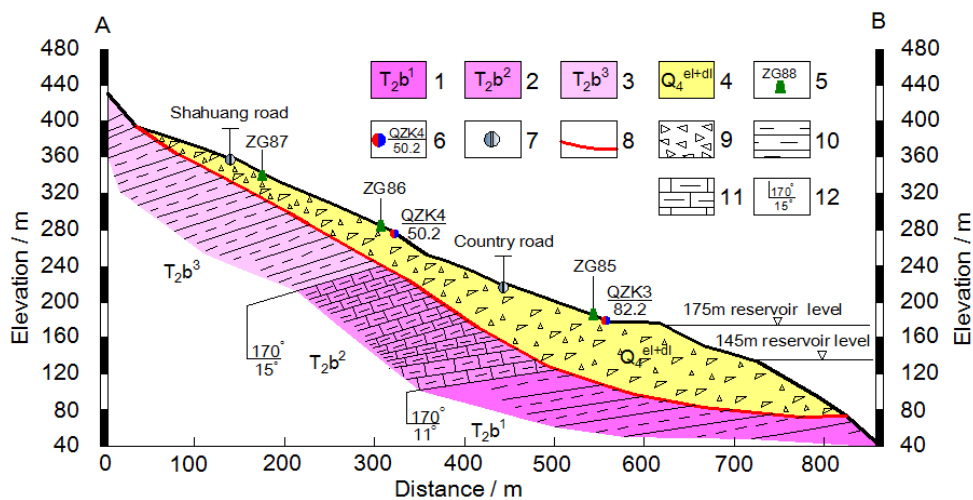

Fig. 5 Geological longitudinal section (line A-B in Fig. 4) of Shuping landslide. 1 Middle Triassic Badong Formation Section 1, 2 Middle Triassic Badong Formation Section 2, 3 Middle Triassic Badong Formation Section 3, 4 Quaternary colluviums, 5 GPS monitoring stations and number, 6 inclinometer monitoring hole and its depth (the unit of depth is the meter), 7 roads, 8 sliding zone, 9 colluvial gravel soil, 10 silty mudstone, 11 argillaceous limestone, and 12 lithology orientation

Fig. 6 shows the monitoring results between July 2003 and October 2013, including rainfall and reservoir water level, which exhibit near episodic movement characteristics after the first impoundment. The displacements in the middle (ZG86) and head scarp (ZG85) areas were greater than that in the back scarp (ZG87) area of longitudinal section A-B, and the displacements in the head scarp (ZG88) and middle (ZG89) areas were greater than that in the back scarp (ZG90) area in the western zone. These observations suggest that landslide displacements increased steadily, and Shuping landslide displayed retrograde style deformation from the lower part to the upper part. The cumulative displacements at the monitoring stations located in the rear areas were relatively low, with an average value of 880 mm, and the cumulative displacements at the monitoring stations located in the middle-frontal areas were very high, with an average value of 3890 mm. Overall, landslide deformation in the eastern zone was greater than that in the western zone. Based on the reservoir water level data and the displacements measured at eight monitoring stations, the cumulative displacement rate increased after the initial impoundment. Due to the increased rainfall and decreased reservoir water level between April and August each year, the cumulative displacement rises rapidly. Notable landslide accelerations can be observed in 2007, 2009, 2011 and 2012. The variations in reservoir water level and heavy rainfall increase pore water pressure and reduce the effective stress in the slope. In addition, the uplift pressure, hydrostatic pressure and hydrodynamic pressure acting on the landslide changed periodically. As a result, the landslide stability decreased and the deformation increased.



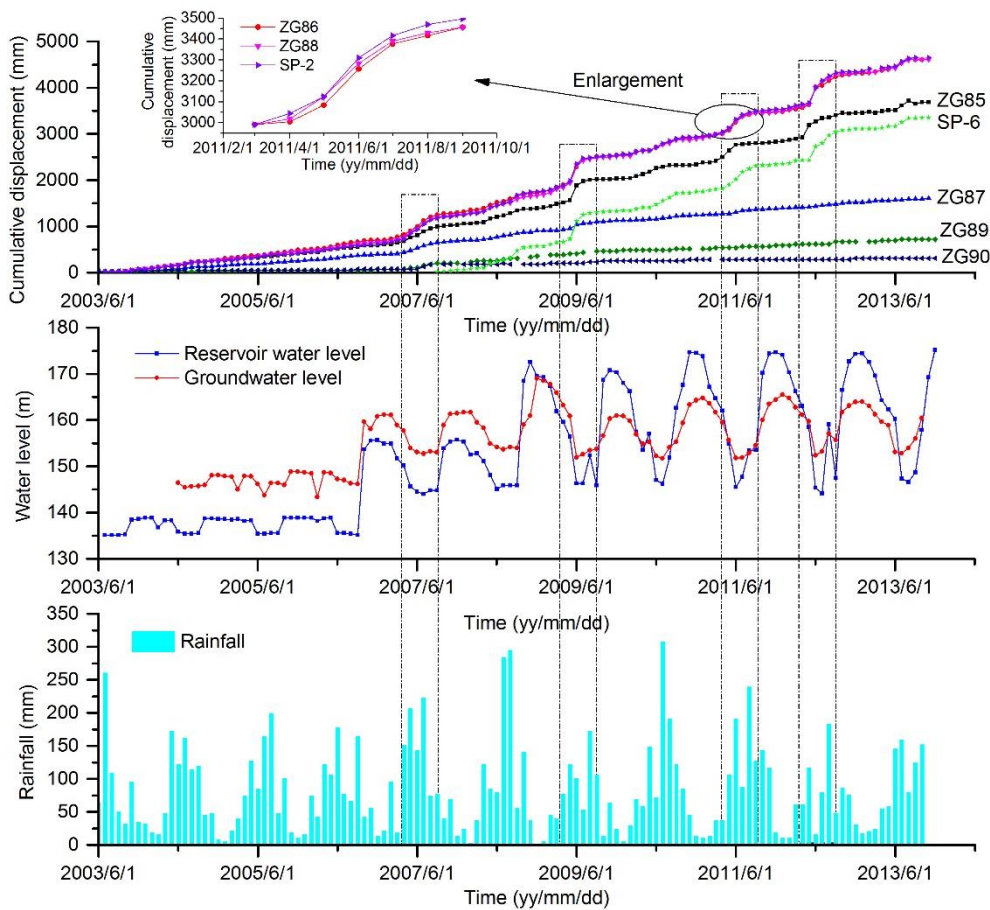

Fig. 6 The relationships between rainfall, reservoir water level and displacement

Many deformation or failure phenomena were observed in the Shuping landslide. In June 2003, a crack was generated in the middle part of the landslide on the outside of a local road, as shown in Fig. 7(a). In 2006, the reservoir water level increased to 156 m for the first time. Fig. 7(b) illustrates that the crack gradually extended to a width of 10 cm within 3 months of completing the road in April 2007. In August 2008, after a heavy storm occurred, deformation and tension cracks developed in the eastern portion of the landslide and impacted houses, as shown in Fig. 7(c). Since 2008, the reservoir water level has increased gradually to 172 m in October. In June 2009, the western portion of the landslide started cracking, with a maximum crack width of 20 cm and depth of 20-50 cm. In addition, several tension cracks formed at the eastern landslide boundary. The tension cracks in the eastern portion are shown in Fig. 7(d). In recent years, the cumulative deformation rate has remained low due to the relatively stable reservoir water level, which has fluctuated between 145 m and 175 m.

Therefore, the landslide deformation characteristics suggest that deformation in the western portion of the landslide is smaller than that in the eastern portion, and the Shuping landslide is affected by reservoir water level fluctuations and rainfall. When rainfall increases abruptly and the reservoir water level drops between April and August annually, the landslide becomes active, which increases landslide deformation. In other conditions, the landslide undergoes slow deformation at a constant speed.

In addition, groundwater, which is regarded as an active geologic agent, is one of the main factors that induces landslide instability. The relationships between the periodic displacement and the groundwater and the reservoir water level are illustrated in Fig. 6. In the rising phase of reservoir water level, the groundwater level gradually increases, with a slight lag behind the increase in the reservoir water level. The groundwater remains high enough for ongoing movement to continue. Conversely, the groundwater level decreases in the declining phase of the reservoir water level. Moreover, the uplift pressure and seepage force of groundwater are dynamic processes that affect landslide stability. Therefore, groundwater influences displacement.

Overall, the reservoir water level, rainfall and groundwater are the major factors that influence the displacement of the Shuping landslide. The landslide displacement obviously increases when the reservoir water level decreases or when rainfall is heavy and continuous because the excess pore water pressure reduces the mean effective stress at the landslide shear surface making it more susceptible to movement.

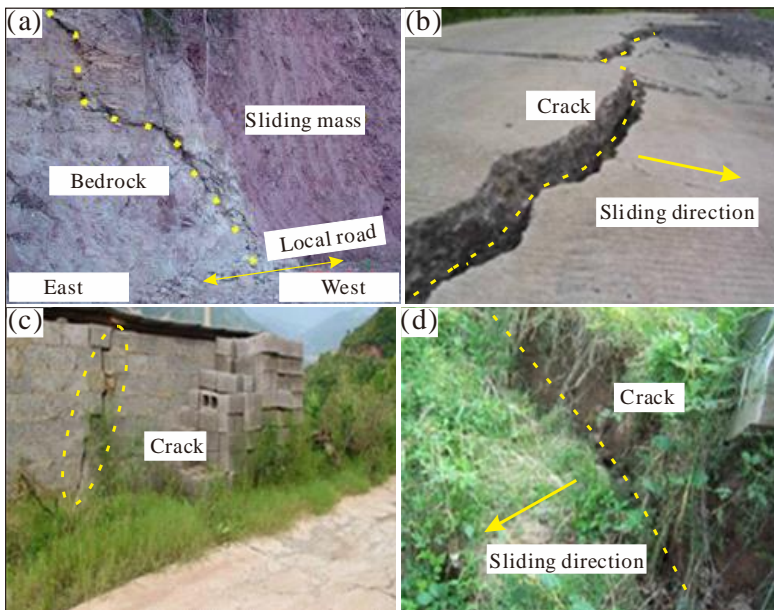

Fig. 7 Photographs of the ground cracks in the landslide (Ren et al., 2015): (a) crack in the middle of the landslide on the outside of the local road, (b) failure state of the local road, (c) wall cracking and subsidence in the eastern portion, and (d) the tension cracks in the eastern portion

During the period between June 2003 to June 2009, monitoring data show that the landslide deformation differences are manifested in the ground surface, and they display vertically distributed characteristics with elevation. In conclusion, the surface displacements below 200 m in elevation are larger than those above 200 m, and deformation is largest close to 175 m, which is the upper limit of the reservoir water level. This observation is due to the considerable influence of fluctuations in the reservoir water level on the landslide area below 200 m. The deep deformation of the landslide exhibited distinct differences at different depths, as shown in Fig. 8. Inclinometer monitoring holes QZK3 and QZK4, QZK1 and QZK2, which are located in the western portion of the landslide, exhibited small deformation and similar deformation trends. Thus, their lateral displacement curves are not presented, and only the curves of QZK3 and QZK4 are illustrated in this paper. The figures show that the sliding zones of QZK3 and QZK4 are located at elevations of 70 m and 30 m, respectively. Furthermore, the displacement change in the shallow sliding zones of both QZK3 and QZK4 is larger than that in the deep sliding zone.

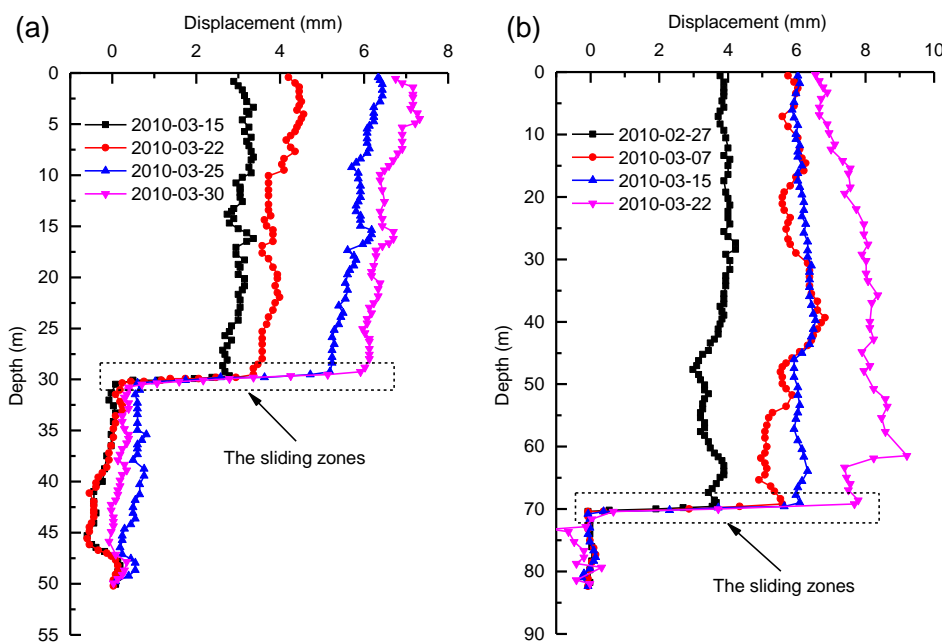

Fig. 8 Lateral displacements of Shuping landslide: (a) inclinometer monitoring hole QZK3 and (b) inclinometer monitoring hole

1 QZK4

## 2 4 Landslide displacement prediction

3 Based on the analysis of the deformation characteristics of Shuping landslide and the GA-LSSVM model above and due to  
4 the obvious nonlinear and episodic movement deformation characteristics of monitoring stations ZG85, ZG86 and ZG87, we  
5 select only these stations along longitudinal section A-B to verify and establish the prediction model. The model information  
6 includes rainfall, the reservoir water level, human activities and the long-term behavior of Shuping landslide. Because the integrity  
7 of the data collected at monitoring points has an effect on the displacement prediction, the monitoring data from July 2003 to  
8 October 2013 are selected to explore landslide deformation. The data before October 2012 are used to train the GA-LSSVM  
9 model, and the data after October 2012 are used to test the model.

### 10 4.1 Prediction of the trend component displacement

11 Due to the scheduling period of the reservoir and the rainfall cycle, we choose 12 months as the moving average period.  
12 Because the curves of the trend component displacement versus time have quasi-linear and incremental characteristics, we use  
13 polynomial functions to fit these curves and provide the best-fitted results. The predicted and measured results of the trend  
14 component displacement at monitoring stations ZG85, ZG86 and ZG87 are shown in Figs. 9(a), 9(b) and 9(c), respectively. They  
15 indicate that the polynomial function provides good prediction performance for the trend component displacement and the fitted  
16 functions are expressed in Eqs. (13), (14) and (15). It is noted that correlation coefficient ( $R^2$ ) is a statistical index used to reflect  
17 the degree of correlation between variables and it is calculated according to the predictive part of the data.

$$18 \quad p_t = -0.0015t^3 + 0.4744t^2 - 8.4975t + 128.83 \quad R^2=0.9980 \quad (13)$$

$$19 \quad p_t = -0.002t^3 + 0.604t^2 - 10.468t + 143.35 \quad R^2=0.9978 \quad (14)$$

$$20 \quad p_t = -0.0015t^3 + 0.3088t^2 - 2.7227t + 29.832 \quad R^2=0.9976 \quad (15)$$

21

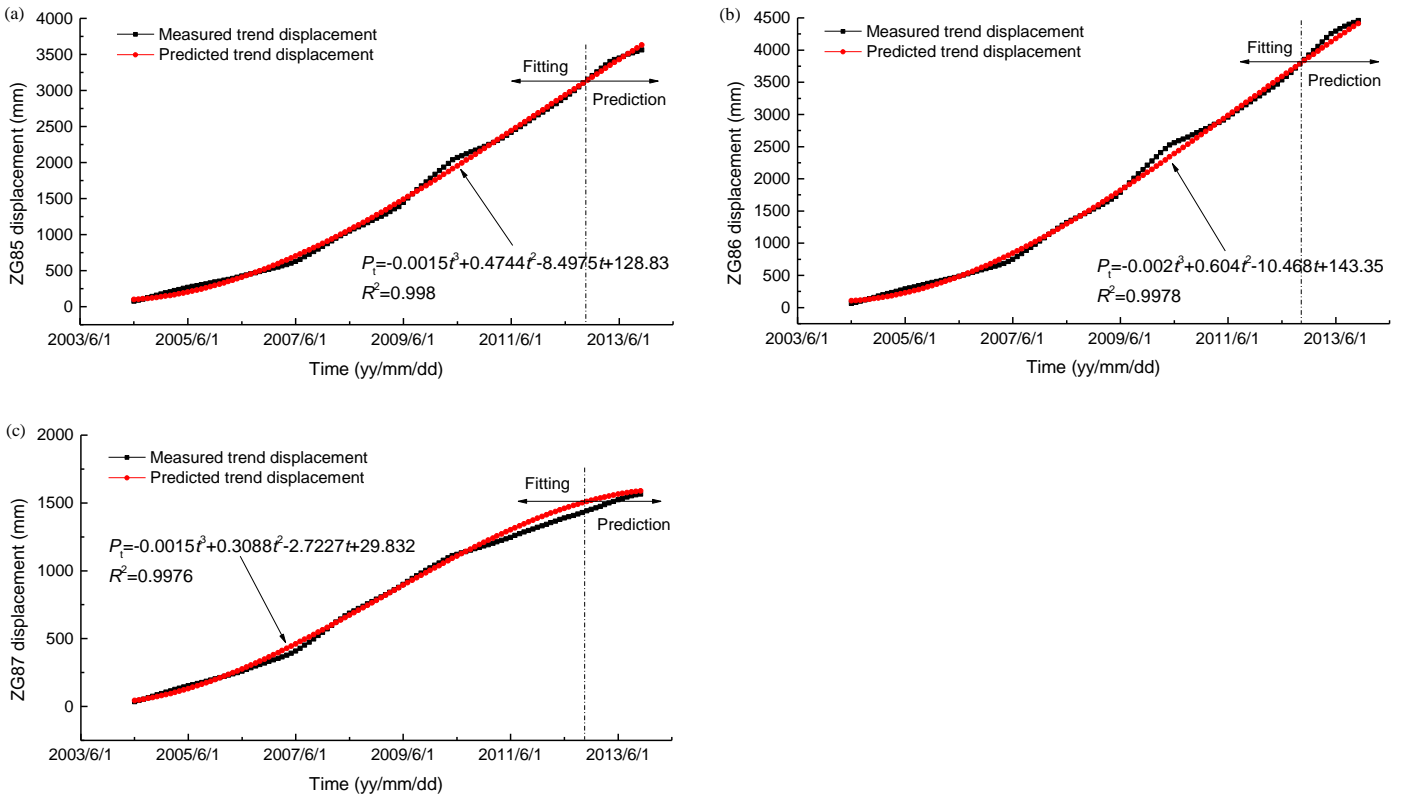

22

23 Fig. 9 Measured and predicted trend component displacement of Shuping landslide

### 24 4.2 The predicted periodic component displacement

25 The periodic component displacement is determined by subtracting the extracted trend component displacement from the

1 cumulative displacement. The periodic displacement and the major influencing factors are illustrated in Figs. 10 and 11. The  
 2 variations in the periodic displacement are consistent with those in the influencing factors. The reservoir water level, rainfall and  
 3 groundwater **significantly** influence the periodic displacement. For example, large periodic displacement can be observed in July  
 4 2009 and September 2012 when the landslide was affected by heavy rainfall and large variations in reservoir water level.  
 5 Although the variation in reservoir water level was small before April 2007, the periodic displacement still exhibited small  
 6 fluctuations due to the effects of rainfall and groundwater. **This behavior could be explained in terms of stress changes within the**  
 7 **landslide in that the rainfall events cause increased pore water pressures in the landslide shear zone which reduced the effective**  
 8 **stress and increased instability.** After April 2007, several **distinct** peaks can be observed in the periodic displacement-time curves  
 9 during periods of decreasing reservoir water level. For example, the periodic displacement increased from May to July 2009 and  
 10 from May to September 2012. However, when the reservoir water level increased from 145 m to 175 m, the periodic displacement  
 11 gradually decreased. **The main reason for the above conditions was that the rise of the reservoir water level increased the**  
 12 **confining stress on the surface of the landslide and the hydrodynamic pressure, the direction of which was toward the interior of**  
 13 **sliding body. Similarly, the lowering of the reservoir water level reduced the confining stress whilst pore water pressures were still**  
 14 **high which would promote accelerated movement.** The periodicity of the rainfall also affected the **displacement rate.** The periodic  
 15 displacement increased with increasing rainfall and reached a peak value in summer, which reflects a certain lag. **For example,**  
 16 **during February and June 2007, the reservoir water level decreased 10 m, while the rainfall was 297.7 mm during the subsequent**  
 17 **2 months, which should have been enough to trigger landslide deformation. Therefore, the decrease of the reservoir water level**  
 18 **continued to have an effect on displacement and there was also a lag effect, which means the displacement did not occur as soon**  
 19 **as the reservoir water level decreased, but was delayed.**

20 **At the head scarp of the landslide at an elevation of 181m, groundwater depth was measured by water level sensor within**  
 21 **inclinometer monitoring hole QZK3. The change in groundwater depth exhibited considerable agreement with rainfall and**  
 22 **reservoir water level fluctuations, with a slight lag observed for the latter. When the reservoir water level and the groundwater**  
 23 **depth were decreasing at different speeds, the groundwater will respond with a lag in relation to the variations of the reservoir**  
 24 **water level.** Due to the slight lag with the reservoir water level, groundwater increased the hydrodynamic pressure during periods  
 25 when the reservoir water level decreased or remained stable, which resulted in continuous deformation of the landslide. Therefore,  
 26 in the shallow groundwater zone, the periodic displacements measured at the three monitoring stations exhibited considerable  
 27 fluctuations. In conclusion, the results in Figs. 10 and 11 **indicate** that the reservoir water level **exerts the most influences on the**  
 28 **displacement rate.**

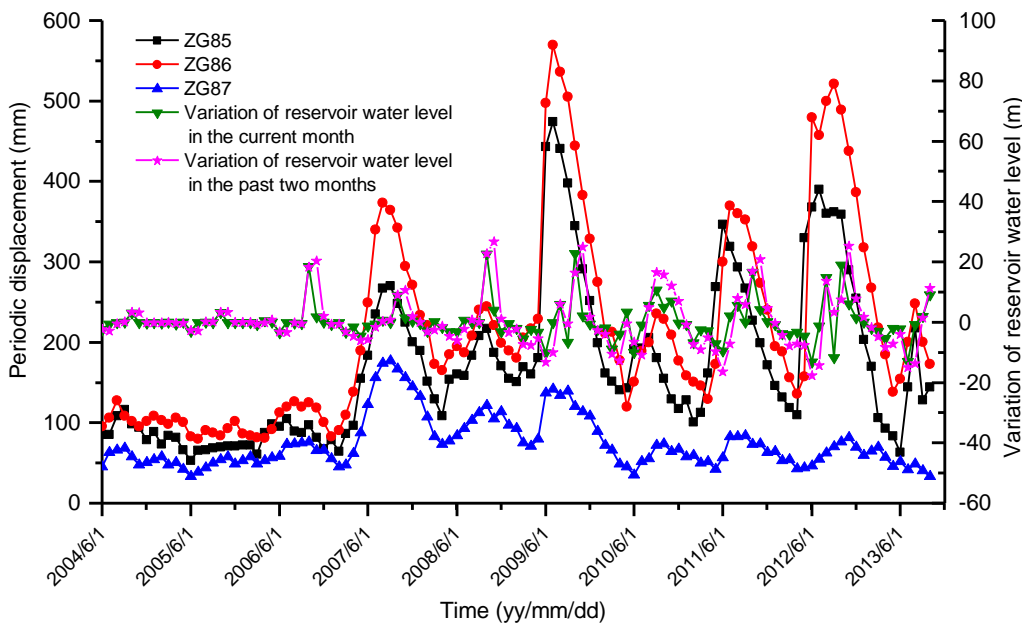

29  
 30 Fig. 10 The relationship between reservoir water level and the periodic displacement at GPS monitoring stations

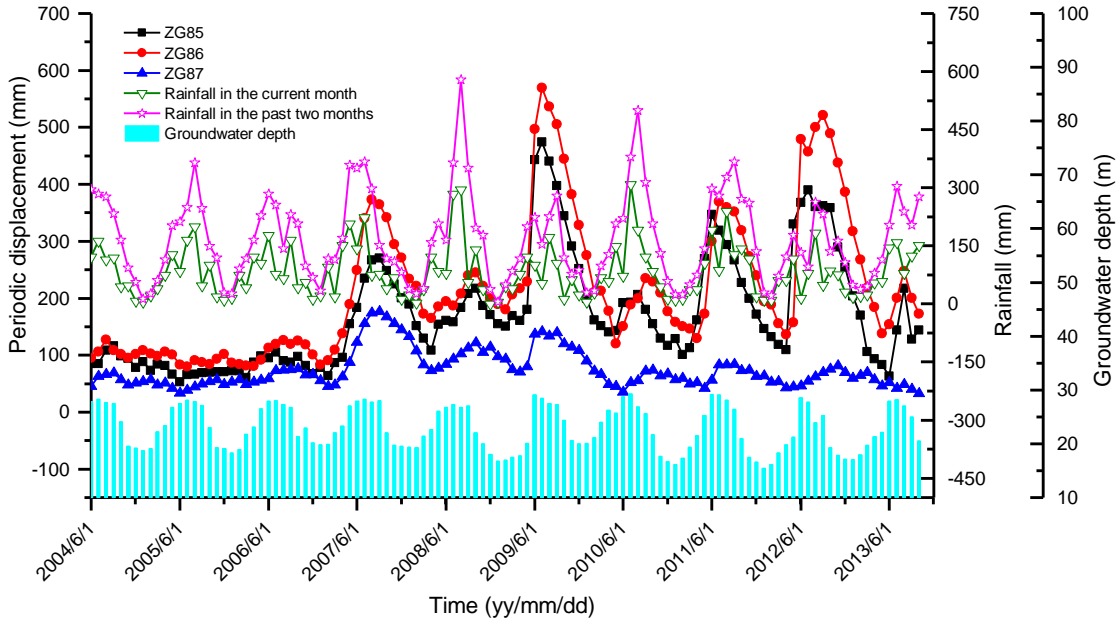

Fig. 11 The relationships between rainfall, groundwater depth and periodic displacement at GPS monitoring stations

The grey relational grade can represent the proximity degree between two series. If the trends in the two series are consistent or the degree of synchronous change is high, then the relational grade associated with system development is large. Otherwise, the relational grade is small. To remove the influence of dimensional data, data series must be normalized before calculating the relational grades, including the series of periodic displacement, rainfall and reservoir water level changes. The normalized formula can be expressed by Eq. (16):

$$\bar{y} = \frac{y - y_{\min}}{y_{\max} - y_{\min}} \quad (16)$$

where  $\bar{y}$  is the normalized value,  $y$  is the original value,  $y_{\max}$  is the maximum value of the data series, and  $y_{\min}$  is the minimum value of the data series.

The grey relational coefficient of each data series and reference data series at each moment can be calculated as the following:

$$\gamma(y_0(k), y_i(k)) = \frac{\Delta \min + \rho \Delta \max}{\Delta_{oj}(k) + \rho \Delta \max} \quad (17)$$

where  $j=1,2,\dots,n$ ;  $k=1,2,\dots,m$ ,  $n$  is the number of data series items and  $m$  is the number of parameters,  $y_0(k)$  is the reference data series,  $y_j(k)$  is the series after data preprocessing,  $\Delta_{oj}(k) = \|y_0(k) - y_j(k)\|$  is the absolute value of the difference between  $y_0(k)$  and  $y_j(k)$ ,  $\Delta \min = \min_{\forall j \in i} \min_{\forall k} \|y_0(k) - y_j(k)\|$  is the smallest value of  $y_j(k)$ ,  $\Delta \max = \max_{\forall j \in i} \max_{\forall k} \|y_0(k) - y_j(k)\|$  is the largest value of  $y_j(k)$ ,  $\rho$  is the distinguishing coefficient,  $\rho \in [0,1]$ . The smaller a value of  $\rho$  is, the larger the distinguished ability is.  $\rho = 0.5$  is generally used in the paper.

Then the average value of the grey relational coefficients is regarded as the grey relational grade (Tosun 2006). Thus, the grey relational grade is generated as follows:

$$\bar{\gamma}_j = \frac{1}{k} \sum_{i=1}^m \gamma_{ij} \quad (18)$$



where  $\overline{\gamma_j}$  is the grey relational grade for the  $j$ th data series.

Based on the grey relational analysis method, the relational grades between the influencing factors and the periodic displacements are shown in Table 1. We can use the large grey relational grades as the input variables in the GA-LSSVM model. When the relational grade is larger than 0.6, the influencing factor is closely correlated with the periodic displacement, which suggests that the selection of the influencing factor for predicting periodic displacement is reasonable (Wang 2003; Wang et al. 2004). In addition, based on research on the relationship between reservoir water level and landslide or the relationship between rainfall and landslide, the variation of the reservoir water level or the cumulative rainfall in the current month and the past two months before landslide failure all have strong influences on landslide deformation rates. Therefore, comprehensively considering the characteristics of the periodic displacement and the relational grades between variables, the cumulative rainfall in the current month, the cumulative rainfall in the past two months, the reservoir water level, the variation in the reservoir water level in the current month, the variation in the reservoir water level in the past two months are selected as input variables. In addition, the infiltration of rainfall and reservoir water level changes the dynamic characteristics of groundwater in landslide, which reflects the change of groundwater level. On the one hand, the change of groundwater level makes sliding mass or sliding zone in a dry and wet circulation state, which leads to changes in the physical and mechanical properties of the sliding mass or sliding zone. On the other hand, due to the change of groundwater level, the seepage force and the uplift pressure of groundwater acting on the landslide change dynamically. Hence, considering the influences of rainfall and reservoir water level on landslide displacement, and in order to make prediction performance more accurate, it is also necessary to select groundwater depth as input variable for landslide prediction. Moreover, the periodic component displacement is established as the output variable for use in the GA-LSSVM model.

Table 1 Relational grades between input variables and the periodic displacements

| Monitoring station | Relational grade                             |                                                |                           |                                                                 |                                                                   |                   |
|--------------------|----------------------------------------------|------------------------------------------------|---------------------------|-----------------------------------------------------------------|-------------------------------------------------------------------|-------------------|
|                    | The cumulative rainfall in the current month | The cumulative rainfall in the past two months | The reservoir water level | The variation of The reservoir water level in the current month | The variation of The reservoir water level in the past two months | Groundwater depth |
| ZG85               | 0.700                                        | 0.705                                          | 0.763                     | 0.797                                                           | 0.768                                                             | 0.718             |
| ZG86               | 0.682                                        | 0.691                                          | 0.756                     | 0.794                                                           | 0.770                                                             | 0.714             |
| ZG87               | 0.692                                        | 0.705                                          | 0.724                     | 0.794                                                           | 0.780                                                             | 0.720             |

The parameters of the LSSVM are optimized by the GA, including the best values of  $C$  and  $\sigma$ . Table 2 shows the optimal parameters of the LSSVM. The maximum generation threshold of the GA is 200, and the population number is 20. To validate the prediction ability of the GA-LSSVM model, we compare the results of generalized regression neural network (GRNN) and back propagation (BP) with two hidden layers with the result of the GA-LSSVM model. In this paper, the smoothing factor of the GRNN is 0.48, and there are 10 nodes in one of the hidden layers and 11 nodes in the other hidden layer of the BP.

Table 2 Optimal parameters of the LSSVM model

| Number | Monitoring station | $C$     | $\sigma$ |
|--------|--------------------|---------|----------|
| 1      | ZG85               | 11.8234 | 6.4122   |
| 2      | ZG86               | 4.7346  | 8.0545   |
| 3      | ZG87               | 39.7819 | 5.7981   |

The prediction results of the periodic component displacement are shown in Fig. 12. The predicted values of the three prediction models and the measured values are consistent and illustrate similar trends. However, the predicted values obtained using the GA-LSSVM exhibit better agreement with observations than the other methods. Notably, the advantages of the model are clear from April 2013 to October 2013 in Fig. 12(a) and 12(b), as the periodic component displacement exhibited good agreement with the major influencing factors during a period of heavy rainfall and large fluctuations in the reservoir water level. Though Fig.12(b) do not match well, on the whole, its difference is less than the other two methods. Especially, in August and September 2013, the differences between predicted values and measured values are all 10 mm. However, in terms of BP model, the differences between predicted values and measured values are 107 mm and 109 mm, respectively, and their differences for GRNN model are 137 mm and 142 mm, respectively.

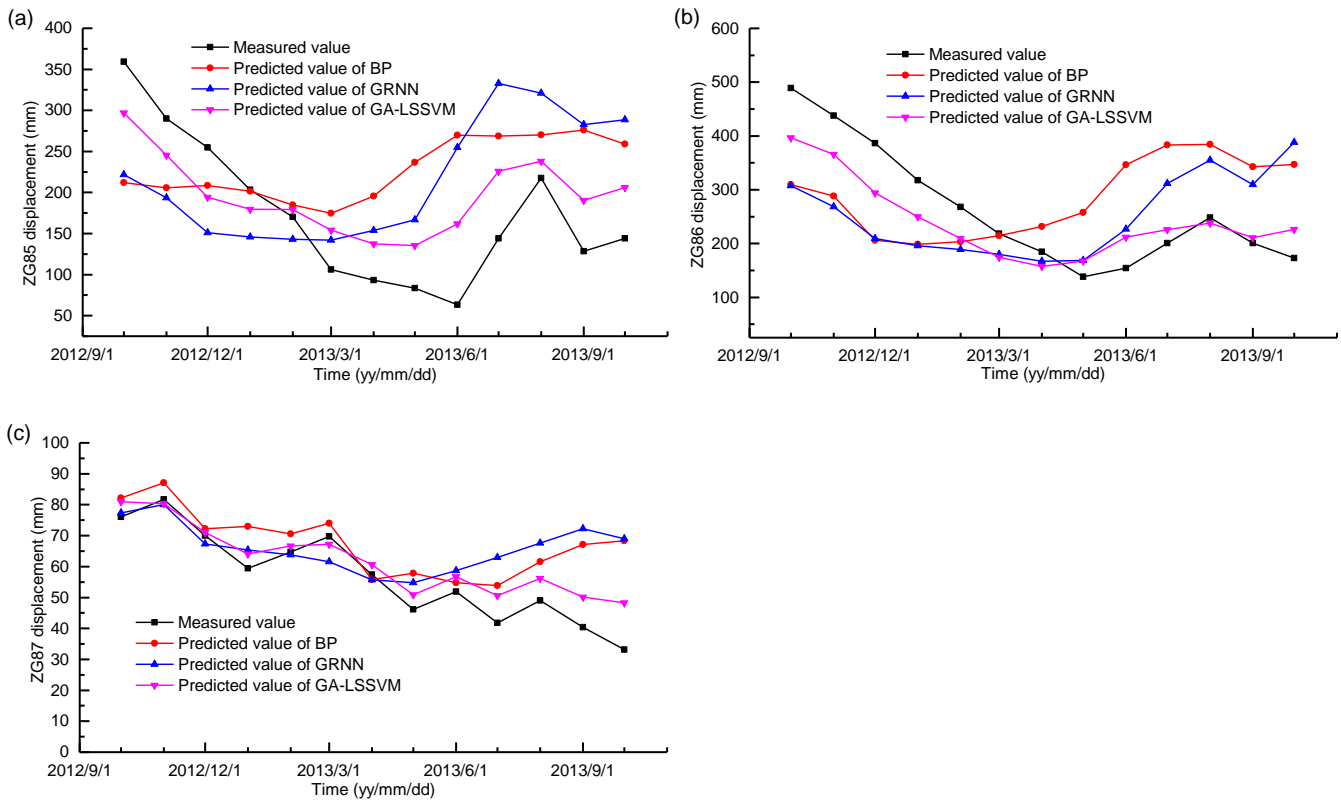

Fig. 12 Measured displacement and predicted periodic displacement of Shuping landslide

### 4.3 Predicted cumulative displacement

The predicted cumulative displacement is determined from the sum of the predicted trend displacement and the predicted periodic displacement. The predicted cumulative displacements and the measured values are presented in Table 3, Table 4 and Table 5 for monitoring station ZG85, ZG86 and ZG87, respectively. The results given in Table 3, Table 4 and Table 5 suggest that the GA-LSSVM model has better prediction performance than the GRNN model and the BP model, with a smaller relative error. Comparisons between the predicted values of cumulative displacement and measured values are shown in Fig. 13. The diagonal line shows the best prediction result in Fig. 13. The results are underestimated if the predicted values are located below the diagonal line, whereas the predicted values located above the line are overestimated. The predicted values from all the monitoring stations show good consistency with the measured values, as shown in Fig. 13.

Table 3 Comparison between the predicted values of cumulative displacement and measured values at monitoring station ZG85

| Time      | Measured value (mm) | GA-LSSVM             |                    | GRNN                 |                    | BP                   |                    |
|-----------|---------------------|----------------------|--------------------|----------------------|--------------------|----------------------|--------------------|
|           |                     | Predicted value (mm) | Relative error (%) | Predicted value (mm) | Relative error (%) | Predicted value (mm) | Relative error (%) |
| 2012/10/1 | 3460.208            | 3399.937             | 1.74               | 3324.829             | 3.91               | 3315.157             | 4.38               |
| 2012/11/1 | 3442.907            | 3389.608             | 1.55               | 3337.861             | 3.05               | 3349.827             | 2.78               |
| 2012/12/1 | 3460.208            | 3379.418             | 2.33               | 3336.503             | 3.58               | 3393.732             | 1.96               |
| 2013/1/1  | 3460.208            | 3406.014             | 1.57               | 3371.989             | 2.55               | 3427.727             | 0.95               |
| 2013/2/1  | 3477.509            | 3446.374             | 0.90               | 3410.133             | 1.94               | 3452.011             | 0.74               |
| 2013/3/1  | 3460.208            | 3462.169             | 0.06               | 3449.721             | 0.30               | 3482.668             | 0.64               |
| 2013/4/1  | 3494.81             | 3485.798             | 0.26               | 3502.356             | 0.22               | 3543.963             | 1.39               |
| 2013/5/1  | 3512.111            | 3524.423             | 0.35               | 3555.754             | 1.24               | 3625.738             | 3.13               |
| 2013/6/1  | 3512.111            | 3591.262             | 2.25               | 3684.274             | 4.90               | 3699.022             | 5.05               |
| 2013/7/1  | 3615.917            | 3695.444             | 2.20               | 3802.473             | 5.16               | 3738.225             | 3.27               |
| 2013/8/1  | 3719.723            | 3747.513             | 0.75               | 3830.496             | 2.98               | 3779.618             | 1.58               |
| 2013/9/1  | 3650.519            | 3740.002             | 2.45               | 3832.151             | 4.98               | 3825.664             | 4.58               |
| 2013/10/1 | 3685.121            | 3795.259             | 2.99               | 3877.587             | 5.22               | 3848.299             | 4.24               |

Table 4 Comparison between the predicted values of cumulative displacement and measured values at monitoring station ZG86

| Time | Measured value (mm) | GA-LSSVM             |                    | GRNN                 |                    | BP                   |                    |
|------|---------------------|----------------------|--------------------|----------------------|--------------------|----------------------|--------------------|
|      |                     | Predicted value (mm) | Relative error (%) | Predicted value (mm) | Relative error (%) | Predicted value (mm) | Relative error (%) |

|           |          |          |      |          |      |          |      |
|-----------|----------|----------|------|----------|------|----------|------|
| 2012/10/1 | 4273.356 | 4183.984 | 2.09 | 4094.396 | 4.19 | 4096.849 | 4.13 |
| 2012/11/1 | 4290.657 | 4201.857 | 2.07 | 4104.93  | 4.33 | 4124.839 | 3.86 |
| 2012/12/1 | 4307.958 | 4149.796 | 3.67 | 4094.607 | 4.95 | 4091.602 | 5.02 |
| 2013/1/1  | 4307.958 | 4164.444 | 3.33 | 4130.77  | 4.11 | 4133.425 | 4.05 |
| 2013/2/1  | 4325.26  | 4192.775 | 3.06 | 4172.182 | 3.54 | 4186.816 | 3.20 |
| 2013/3/1  | 4342.561 | 4256.46  | 1.98 | 4212.082 | 3.00 | 4246.771 | 2.21 |
| 2013/4/1  | 4377.163 | 4317.892 | 1.35 | 4247.617 | 2.96 | 4312.109 | 1.49 |
| 2013/5/1  | 4394.464 | 4326.232 | 1.55 | 4297.626 | 2.20 | 4386.529 | 0.18 |
| 2013/6/1  | 4446.367 | 4388.693 | 1.30 | 4403.464 | 0.96 | 4523.094 | 1.73 |
| 2013/7/1  | 4532.872 | 4495.404 | 0.83 | 4535.948 | 0.07 | 4607.573 | 1.65 |
| 2013/8/1  | 4619.377 | 4609.902 | 0.21 | 4626.647 | 0.16 | 4656.543 | 0.80 |
| 2013/9/1  | 4602.076 | 4579.721 | 0.49 | 4628.676 | 0.58 | 4661.733 | 1.30 |
| 2013/10/1 | 4602.076 | 4592.204 | 0.21 | 4754.15  | 3.30 | 4713.128 | 2.41 |

1 Table 5 Comparison between the predicted values of cumulative displacement and measured values at monitoring station ZG87

| Time      | Measured value (mm) | GA-LSSVM             |                    | GRNN                 |                    | BP                   |                    |
|-----------|---------------------|----------------------|--------------------|----------------------|--------------------|----------------------|--------------------|
|           |                     | Predicted value (mm) | Relative error (%) | Predicted value (mm) | Relative error (%) | Predicted value (mm) | Relative error (%) |
| 2012/10/1 | 1505.19             | 1561.869             | 3.77               | 1578.221             | 4.85               | 1583.026             | 5.17               |
| 2012/11/1 | 1522.491            | 1580.602             | 3.82               | 1590.364             | 4.46               | 1597.352             | 4.92               |
| 2012/12/1 | 1522.491            | 1580.359             | 3.80               | 1586.605             | 4.21               | 1591.506             | 4.53               |
| 2013/1/1  | 1522.491            | 1581.923             | 3.90               | 1593.249             | 4.65               | 1600.855             | 5.15               |
| 2013/2/1  | 1539.792            | 1585.652             | 2.98               | 1599.822             | 3.90               | 1606.609             | 4.34               |
| 2013/3/1  | 1557.093            | 1600.959             | 2.82               | 1605.274             | 3.09               | 1617.769             | 3.90               |
| 2013/4/1  | 1557.093            | 1601.648             | 2.86               | 1606.713             | 3.19               | 1606.812             | 3.19               |
| 2013/5/1  | 1557.093            | 1608.744             | 3.32               | 1612.571             | 3.56               | 1615.702             | 3.76               |
| 2013/6/1  | 1574.394            | 1620.881             | 2.95               | 1622.897             | 3.08               | 1618.934             | 2.83               |
| 2013/7/1  | 1574.394            | 1620.703             | 2.94               | 1632.984             | 3.72               | 1623.904             | 3.14               |
| 2013/8/1  | 1591.696            | 1631.651             | 2.51               | 1643.08              | 3.23               | 1637.051             | 2.85               |
| 2013/9/1  | 1591.696            | 1630.511             | 2.44               | 1652.604             | 3.83               | 1647.566             | 3.51               |
| 2013/10/1 | 1591.696            | 1633.119             | 2.60               | 1653.808             | 3.90               | 1653.139             | 3.86               |

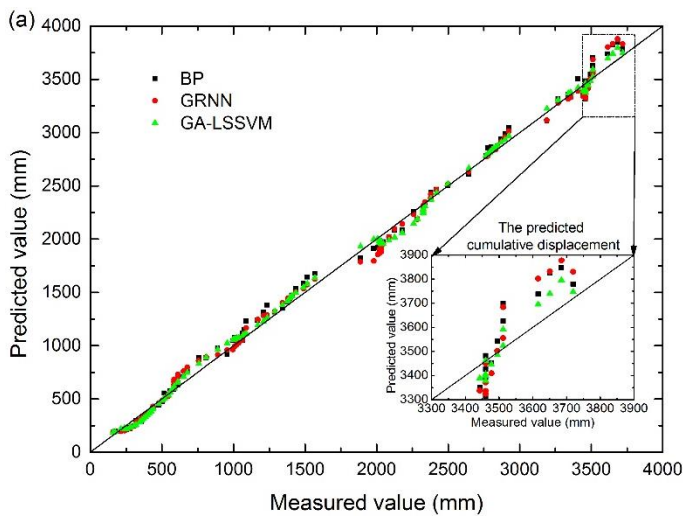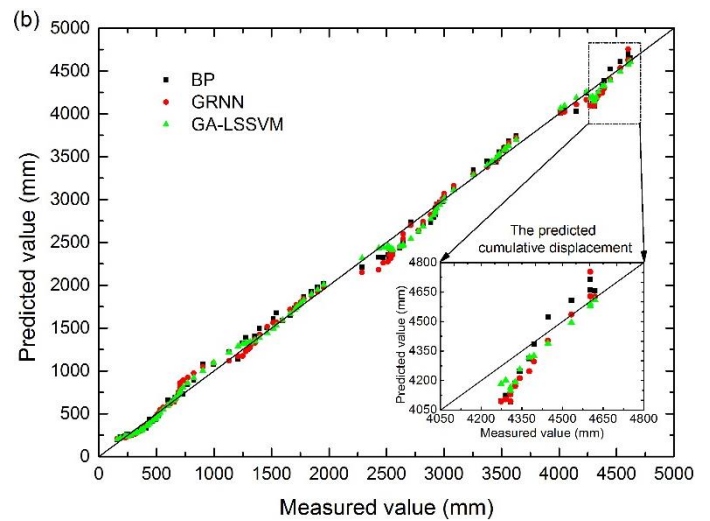

2



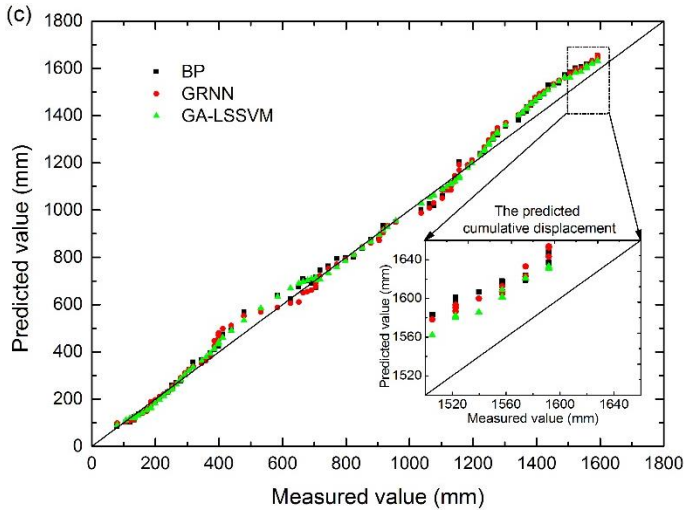

Fig. 13 Measured values versus predicted values of the cumulative displacement: (a) monitoring station ZG85, (b) monitoring station ZG86, and (c) monitoring station ZG87

### 5 Verification and error analyses

Three loss functions are used to assess the prediction performance and accuracy of the proposed model: the root mean square error (*RMSE*), mean absolute error (*MAE*), and mean absolute percentage error (*MAPE*). Then, the optimal parameters with minimum error are used to train the LSSVM model. The *RMSE*, *MAE* and *MAPE* formulas are as follows:

$$RMSE = \sqrt{\frac{1}{n} \sum_{i=1}^n (s_i - s_i^*)^2} \quad (19)$$

$$MAE = \frac{1}{n} \sum_{i=1}^n |s_i - s_i^*| \quad (20)$$

$$MAPE = \frac{1}{n} \sum_{i=1}^n \left| \frac{s_i - s_i^*}{s_i} \right| \quad (21)$$

where  $s_i$  is the measured value,  $s_i^*$  is the predicted value, and  $n$  is the number of predicted values.

The performances of different models for landslide displacement prediction are assessed based on the *RMSE*, *MAE* and *MAPE*, as presented in Table 6. The prediction precision of the GA-LSSVM model based on time series analysis is better than that of the GRNN and the BP. Notably, the *RMSE*, *MAE* and *MAPE* values of the GA-LSSVM model were 63.4076, 56.6098 and 1.587% lower than those of the GRNN model, respectively, and 49.3696, 43.5537 and 1.225% lower than those of the BP model for monitoring station ZG85. The predicted results for monitoring stations ZG86 and ZG87 exhibited similar trends. According to the prediction results, the GA-LSSVM model has good deduction ability for landslide displacement prediction and can provide assistance in early risk assessment and landslide forecasting.

Table 6 Comparison of the performance of cumulative displacement prediction for the three models

| Model    | <i>RMSE</i> (mm) |          |         | <i>MAE</i> (mm) |          |         | <i>MAPE</i> (%) |       |       |
|----------|------------------|----------|---------|-----------------|----------|---------|-----------------|-------|-------|
|          | ZG85             | ZG86     | ZG87    | ZG85            | ZG86     | ZG87    | ZG85            | ZG86  | ZG87  |
| GA-LSSVM | 62.4146          | 87.7215  | 49.0485 | 53.0048         | 74.0601  | 48.5392 | 1.492           | 1.703 | 3.131 |
| GRNN     | 125.8222         | 134.6764 | 59.8173 | 109.6146        | 115.1067 | 59.2756 | 3.079           | 2.643 | 3.821 |
| BP       | 111.7842         | 123.1948 | 62.0223 | 96.5585         | 107.6724 | 60.9701 | 2.717           | 2.464 | 3.935 |

### 6 Conclusion

Landslide displacement prediction is a major focus of contemporary landslide research. We use the deformation of a episodic movement landslide (Shuping landslide) as an example. According to time series analysis, the cumulative displacement is decomposed into a trend component displacement representing the trend of landslide deformation in the long term and a periodic

1 component displacement that represents short-term deformation fluctuations. The trend displacement and periodic displacement  
2 are predicted using a polynomial function and the GA-LSSVM model, respectively. The LSSVM yields good fitting results in  
3 predicting the periodic displacement with the GA, which is utilized to determine the optimal parameters of the LSSVM. Based on  
4 our analysis of the deformation of Shuping landslide, the reservoir water level, rainfall and groundwater have major influences on  
5 the cumulative displacement. Therefore, based on the relational grades, we select six influential factors as the input variables. The  
6 predicted cumulative displacement is obtained from the sum of the predicted trend displacement and the predicted periodic  
7 displacement.

8 The GA-LSSVM model displays the highest accuracy, the smallest *RMSE* of 62.4146 mm, the smallest *MAE* of 53.0048  
9 mm, and the smallest *MAPE* of 1.492% at monitoring station ZG85, while these three values are 87.7215 mm, 74.0601 mm and  
10 1.703% at monitoring station ZG86 and 49.0485 mm, 48.5392 mm and 3.131% at monitoring station ZG87. The study results  
11 show that GA-LSSVM provides good performance for landslide displacement prediction, and the GA is appropriate for  
12 determining the optimal parameters used in the LSSVM model. Thus, the GA-LSSVM model can be effectively used to predict  
13 landslide displacement and reflect the corresponding relationships between the major influencing factors and the periodic  
14 component displacement.

### 15 **Acknowledgments**

16 The authors would like to acknowledge gratefully the Editor and the anonymous reviewers for their constructive criticism  
17 on the earlier version of this paper and offering valuable suggestions that contributed to its improvement. This study was  
18 supported by National Natural Science Foundation of China, Key Project of National Science Foundation of China (No. 41230637,  
19 No. 41502290), the Ministry of Science and Technology of the P. R. China, National Basic Research Program of China (973  
20 Program) (2011CB710600).

### 22 **References**

- 23 Abdi, M. J., and Giveki, D.: Automatic detection of erythematous-squamous diseases using PSO-SVM based on association rules,  
24 Eng Appl Artif Intel, 26, 603-608, 10.1016/j.engappai.2012.01.017, 2013.
- 25 Ahmed, B.: Landslide susceptibility mapping using multi-criteria evaluation techniques in Chittagong Metropolitan Area,  
26 Bangladesh, Landslides, 6, 1077-1095, 10.1007/s10346-014-0521-x, 2013.
- 27 Ali Ahmadi, M., Zendejboudi, S., Lohi, A., Elkamel, A., and Chatzis, I.: Reservoir permeability prediction by neural networks  
28 combined with hybrid genetic algorithm and particle swarm optimization, Geophys Prospect, 61, 582-598,  
29 10.1111/j.1365-2478.2012.01080.x, 2013.
- 30 Altinel, B., Can Ganiz, M., and Diri, B.: A corpus-based semantic kernel for text classification by using meaning values of terms,  
31 Eng Appl Artif Intel, 43, 54-66, 10.1016/j.engappai.2015.03.015, 2015.
- 32 Brockwell, P. J., and Davis, R. A.: Time series: theory and methods, Springer Science & Business Media, 2013.
- 33 **Cai, Z., Xu, W., Meng, Y., Shi C., Wang R.: Prediction of landslide displacement based on GA-LSSVM with multiple factors,**  
34 **Bull Eng Geol Environ, 75, 637-646, 10.1007/s10064-015-0804-z, 2016.**
- 35 Cao, Y., Yin, K., Alexander, D. E., and Zhou, C.: Using an extreme learning machine to predict the displacement of step-like  
36 landslides in relation to controlling factors, Landslides, 4, 725-736, 10.1007/s10346-015-0596-z, 2016.
- 37 Corominas, J., Moya, J. E., Ledesma, A., Lloret, A., and Gili, J. A.: Prediction of ground displacements and velocities from  
38 groundwater level changes at the Vallcebre landslide (Eastern Pyrenees, Spain, Landslides, 2, 83-96, 10.1007/s10346-005-0049-1,  
39 2005.
- 40 **Desai, C. S., Samtani, N. C., Vulliet, L.: Constitutive modeling and analysis of creeping slopes, J Geotech Eng Trans ASCE,**  
41 **121,43-56, 10.1061/(ASCE)0733-9410(1995)121:1(43), 1995.**
- 42 Du, J., Yin, K., and Lacasse, S.: Displacement prediction in colluvial landslides, Three Gorges Reservoir, China, Landslides, 10,  
43 203-218, 10.1007/s10346-012-0326-8, 2013.
- 44 Duan, K., Keerthi, S. S., and Poo, A. N.: Evaluation of simple performance measures for tuning SVM hyperparameters,  
45 Neurocomputing, 51, 41-59, 10.1016/S0925-2312(02)00601-X, 2013.
- 46 Elbisy, M. S.: Sea wave parameters prediction by support vector machine using a genetic algorithm, J Coastal Res, 314, 892-899,

1 10.2112/JCOASTRES-D-13-00087.1, 2015.

2 Farzan, A., Mashohor, S., Ramli, A. R., and Mahmud, R.: Boosting diagnosis accuracy of Alzheimer's disease using high  
3 dimensional recognition of longitudinal brain atrophy patterns, *Behav Brain Res*, 290, 124-130, 10.1016/j.bbr.2015.04.010, 2015.

4 Fei, S., Wang, M., Miao, Y., Tu, J., and Liu, C.: Particle swarm optimization-based support vector machine for forecasting  
5 dissolved gases content in power transformer oil, *Energ Convers Manage*, 50, 1604-1609, 10.1016/j.enconman.2009.02.004, 2009.

6 Feng, X., Zhao, H., and Li, S.: Modeling non-linear displacement time series of geo-materials using evolutionary support vector  
7 machines, *Int J Rock Mech Min*, 41, 1087-1107, 10.1016/j.ijrmms.2004.04.003, 2004.

8 Garg, A., and Tai, K.: A hybrid genetic programming-artificial neural network approach for modeling of vibratory finishing  
9 process, *International Proceedings of Computer Science and Information Technology (IPCSIT)*, 14-19, 2011.

10 Garg, A., and Tai, K.: Stepwise approach for the evolution of generalized genetic programming model in prediction of surface  
11 finish of the turning process, *Adv Eng Softw*, 78, 16-27, 10.1016/j.advengsoft.2017.01.005, 2014.

12 Gelisli, K., Kaya, T., and Babacan, A. E.: Assessing the factor of safety using an artificial neural network: case studies on  
13 landslides in Giresun, Turkey, *Environ Earth Sci*, 73, 8639-8646, 10.1007/s12665-015-4027-1, 2015.

14 Goetz, J. N., Brenning, A., Petschko, H., and Leopold, P.: Evaluating machine learning and statistical prediction techniques for  
15 landslide susceptibility modeling, *Comput Geosci-Uk*, 81, 1-11, 10.1016/j.cageo.2015.04.007, 2015.

16 Gu, J., Zhu, M., and Jiang, L.: Housing price forecasting based on genetic algorithm and support vector machine, *Expert Syst*  
17 *Appl*, 38, 3383-3386, 10.1016/j.eswa.2010.08.123, 2011.

18 Guzzetti, F., Reichenbach, P., Cardinali, M., Galli, M., and Ardizzone, F.: Probabilistic landslide hazard assessment at the basin  
19 scale, *Geomorphology*, 72, 272-299, 10.1016/j.geomorph.2005.06.002, 2005.

20 Hejazi, F., Toloue, I., Jaafar, M. S., and Noorzaei, J.: Optimization of earthquake energy dissipation system by genetic algorithm,  
21 *Comput-Aided Civ Infrastruct Eng*, 28, 796-810, 10.1111/mice.12047, 2013.

22 Hong, H., Pradhan, B., Jebur, M. N., Bui, D. T., Xu, C., and Akgun, A.: Spatial prediction of landslide hazard at the Luxi area  
23 (China) using support vector machines, *Environ Earth Sci*, 75, 10.1007/s12665-015-4866-9, 2016.

24 Hwang, S., Jeong, M. K., and Yum, B.: Robust relevance vector machine with variational inference for improving virtual  
25 metrology accuracy, *Ieee T Semiconduct M*, 27, 83-94, 10.1109/TSM.2013.2286498, 2014.

26 Kavzoglu, T., Kutlug Sahin, E., and Colkesen, I.: An assessment of multivariate and bivariate approaches in landslide  
27 susceptibility mapping: a case study of Duzkoy district, *Nat Hazards*, 76, 471-496, 10.1007/s11069-014-1506-8, 2015.

28 Kawabata, D., and Bandibas, J.: Landslide susceptibility mapping using geological data, a DEM from ASTER images and an  
29 artificial neural network (ANN), *Geomorphology*, 113, 97-109, 10.1016/j.geomorph.2009.06.006, 2009.

30 Kirschbaum, D. B., Adler, R., Hong, Y., Hill, S., and Lerner-Lam, A.: A global landslide catalog for hazard applications: method,  
31 results, and limitations, *Nat Hazards*, 3, 561-575, 10.1007/s11069-009-9401-4, 2010.

32 Koza, J. R.: *Genetic programming: on the programming of computers by means of natural selection*, MIT press, Cambridge, MA,  
33 1992.

34 Lessmann, S., Stahlbock, R., and Crone, S. F.: *Optimizing hyperparameters of support vector machines by genetic algorithms*, Las  
35 Vegas, CSREA Press, 2005.

36 Levasseur, S., Malécot, Y., Boulon, M., and Flavigny, E.: Soil parameter identification using a genetic algorithm, *Int J Numer Anal*  
37 *Met*, 32, 189-213, 10.1002/nag.614, 2008.

38 Li, F., Tang, B. P., and Liu, W. Y.: Fault diagnosis based on least square support vector machine optimized by genetic algorithm,  
39 *Journal of Chongqing University*, 33, 14-20, 2010(in Chinese).

40 Lian, C., Zeng, Z. G., Yao, W., and Tang, H. M.: Displacement prediction model of landslide based on a modified ensemble  
41 empirical mode decomposition and extreme learning machine, *Nat Hazards*, 66, 759-771, 10.1007/s11069-012-0517-6, 2013.

42 Lian, C., Zeng, Z. G., Yao, W., and Tang, H. M.: Ensemble of extreme learning machine for landslide displacement prediction  
43 based on time series analysis, *Neural Comput Appl*, 24, 99-107, 10.1007/s00521-013-1446-3, 2014.

44 Lian, C., Zeng, Z., Yao, W., and Tang, H.: Multiple neural networks switched prediction for landslide displacement, *Eng Geol*, 186,  
45 91-99, 10.1016/j.enggeo.2014.11.014, 2015.

46 Lin, P. T.: *Support vector regression: Systematic design and performance analysis*, Department of Electronic Engineering,

1 National Taiwan University, 2001.

2 Liu, Z., Shao, J., Xu, W., Chen, H., and Shi, C.: Comparison on landslide nonlinear displacement analysis and prediction with  
3 computational intelligence approaches, *Landslides*, 11, 889-896, 10.1007/s10346-013-0443-z, 2014.

4 Lv, Y., Liu, J., Yang, T., and Zeng, D.: A novel least squares support vector machine ensemble model for NO<sub>x</sub> emission prediction  
5 of a coal-fired boiler, *Energy*, 55, 319-329, 10.1016/j.energy.2013.02.062, 2013.

6 Marjanović, M., Kovačević, M., Bajat, B., and Voženilek, V.: Landslide susceptibility assessment using SVM machine learning  
7 algorithm, *Eng Geol*, 123, 225-234, 10.1016/j.enggeo.2011.09.006, 2011.

8 Micheletti, N., Foresti, L., Kanevski, M., Pedrazzini, A., and Jaboyedoff, M.: Landslide susceptibility mapping using adaptive  
9 support vector machines and feature selection, *Geophys Res Abstr*, EGU, 13, 2013.

10 Min, J. H., and Lee, Y.: Bankruptcy prediction using support vector machine with optimal choice of kernel function parameters,  
11 *Expert Syst Appl*, 28, 603-614, 10.1016/j.eswa.2004.12.008, 2005.

12 Miyagi, T., Yamashina, S., Esaka, F., and Abe, S.: Massive landslide triggered by 2008 Iwate-Miyagi inland earthquake in the  
13 Aratozawa Dam area, Tohoku, Japan, *Landslides*, 1, 99-108, 10.1007/s10346-010-0226-8, 2011.

14 Nefeslioglu, H. A., Gokceoglu, C., and Sonmez, H.: An assessment on the use of logistic regression and artificial neural networks  
15 with different sampling strategies for the preparation of landslide susceptibility maps, *Eng Geol*, 97, 171-191,  
16 10.1016/j.enggeo.2008.01.004, 2008.

17 Pournasheer, E., Riahi, S., Ganjali, M. R., and Norouzi, P.: Application of genetic algorithm-support vector machine (GA-SVM)  
18 for prediction of BK-channels activity, *Eur J Med Chem*, 44, 5023-5028, 10.1016/j.ejmech.2009.09.006, 2009.

19 Pradhan, B., Abokharima, M. H., Jebur, M. N., and Tehrani, M. S.: Land subsidence susceptibility mapping at Kinta Valley  
20 (Malaysia) using the evidential belief function model in GIS, *Nat Hazards*, 73, 1019-1042, 10.1007/s11069-014-1128-1, 2014.

21 Ren, F., Wu, X., Zhang, K., and Niu, R.: Application of wavelet analysis and a particle swarm-optimized support vector machine  
22 to predict the displacement of the Shuping landslide in the Three Gorges, China, *Environ Earth Sci*, 73, 4791-4804,  
23 10.1007/s12665-014-3764-x, 2015.

24 Sassa, K., Picarelli, L., and Yin, Y. P.: Monitoring, prediction and early warning. In: Sassa K, Canuti P (eds) *Landslides-disaster  
25 risk reduction*, Springer-Verlag, Berlin Heidelberg, 2009.

26 Shen, J., Karakus, M., and Xu, C.: Direct expressions for linearization of shear strength envelopes given by the Generalized  
27 Hoek-Brown criterion using genetic programming, *Comput Geotech*, 44, 139-146, 10.1016/j.compgeo.2012.04.008, 2012.

28 Sun, Z., Choi, T., Au, K., and Yu, Y.: Sales forecasting using extreme learning machine with applications in fashion retailing,  
29 *Decis Support Syst*, 46, 411-419, 10.1016/j.dss.2008.07.009, 2008.

30 Suykens, J.A.K., and Vandewalle, J.: Least Squares Support Vector Machine Classifiers, *Neural Process Lett* 9, 293-300,  
31 10.1023/A:1018628609742, 1999.

32 Suykens, J.A.K., De Brabanter, J., Lukas, L., and Vandewalle, J.: Weighted least squares support vector machines: robustness and  
33 sparse approximation, *Neurocomputing*, 48, 85-105, 10.1016/S0925-2312(01)00644-0, 2002.

34 **Tosun N.: Determination of optimum parameters for multi-performance characteristics in drilling by using grey relational analysis,  
35 The International Journal of Advanced Manufacturing Technology, 28, 450-455, 10.1007/s00170-004-2386-y, 2006.**

36 Turner, D., Lucieer, A., and de Jong, S.: Time series analysis of landslide dynamics using an unmanned aerial vehicle (UAV),  
37 *Remote Sens-Basel*, 7, 1736-1757, 10.3390/rs70201736, 2015.

38 Vandenberghe, F., and Engelbrecht, A. P.: A study of particle swarm optimization particle trajectories, *Inform Sciences*, 176,  
39 937-971, 10.1016/j.ins.2005.02.003, 2006.

40 Vapnik, V.: *The nature of statistical learning theory*, Springer Verlag, New York, 1995.

41 Wang, J. F.: Quantitative prediction of landslide using S-curve, *Chin J Geol Hazard Control*, 14, 3-10, 2003(in Chinese).

42 Wang, Y., Yin, K. L., and An, G. F.: Grey correlation analysis of sensitive factors of landslide, *Rock Soil Mech*, 25, 91-93, 2004(in  
43 Chinese).

44 Xu, H., and Chen, G.: An intelligent fault identification method of rolling bearings based on LSSVM optimized by improved PSO,  
45 *Mech Syst Signal Pr*, 35, 167-175, 10.1016/j.ymsp.2012.09.005, 2013.

46 Yao, W., Zeng, Z. G., Lian, C., and Tang, H. M.: Ensembles of echo state networks for time series prediction. In: *Sixth*

- 1 international conference on advanced computational intelligence, Hangzhou, China, 299-304, 2013.
- 2 Yin, X., and Yu, W.: The virtual manufacturing model of the worsted yarn based on artificial neural networks and grey theory,
- 3 Appl Math Comput, 185, 322-332, 10.1016/j.amc.2006.06.117, 2007.
- 4 Zhang, H., Luo, Y.Y., Zhang, L.T., and Chen, Z.: Cultivated land change forecast based on genetic algorithm and least squares
- 5 support vector machines, Transactions of the Chinese Society of Agricultural Engineering, 25, 226-231, 2009.
- 6 Zhang, W., Niu, P., Li, G., and Li, P.: Forecasting of turbine heat rate with online least squares support vector machine based on
- 7 gravitational search algorithm, Knowl-Based Syst, 39, 34-44, 10.1016/j.knosys.2012.10.004,2013.
- 8
